# Supplementary material
Source: PubMed Central journal article supplement (PMC5664520)
Supplement: pnas.1708447114.sapp.pdf [file pnas.1708447114.sapp.pdf]

## **SI Appendix**

### **Intragenic DNA methylation and BORIS mediated cancer-specific splicing contributes to Warburg effect**

**Smriti Singh, Sathiya Pandi Narayanan, Kajal Biswas, Amit Gupta, Neha Ahuja, Sandhya Yadav, Rajendra Kumar Panday, Atul Samaiya, Shyam K Sharan, Sanjeev Shukla**

## **SI Appendix Materials and Methods**

### **Cell culture**

The human breast cancer cell lines MCF7 and MDA-MB-231 were obtained from American Type Culture Collection (ATCC). MCF7 cell line was cultured at 37°C, 5% CO<sub>2</sub> in ATCC recommended growth medium DMEM (Gibco, 11995-065) whereas MDA-MB-231 cell line was cultured at 37°C without CO<sub>2</sub> in ATCC recommended growth medium L-15 (Gibco, 11415-064). Both the cell lines were supplemented with 10% Fetal Bovine Serum (Invitrogen, 16000044), 100 units/ml of Penicillin and Streptomycin (Invitrogen, 15140122), 2 mmol/l L-glutamine (Sigma, G7513). The human mammary epithelial cells (HMECs) were obtained from Lonza (CC-2551) and cultured in the mammary epithelial cell growth medium (Lonza, CC-3151& CC-4136) according to the manufacturer's instructions.

### **Breast cancer sample collection**

Tumor and adjacent normal tissue pairs were collected from patients undergoing surgery for breast cancer at Navodaya Cancer Hospital and Bansal Hospital, Bhopal, India. The study was approved by the Institute Ethics Committee of Indian Institute of Science Education and Research Bhopal. The informed consent was obtained from all the patients. The tissue samples were snap frozen immediately after surgery and stored at -80°C until use. The tissues for RNA isolation were collected in RNA later (Thermo Fisher Scientific, AM7024)

after surgery, snap frozen and stored at -80°C until use. Clinical characteristics of patients used in the study are presented in *SI Appendix* Table S6.

### Plasmids

The PKM2 overexpression plasmid was constructed by amplifying a 1.5-kb PKM fragment from MCF7 cDNA using Platinum Taq High-Fidelity DNA Polymerase (Thermo Fisher Scientific, 11304029) and primers PKM2 Fw (5'TTTTGC GGCCGCATGTCACCGGAAGCCCAA-3') and PKM2 Rev (5'-TTTGTCTCGACTCACGGCACAGGAACAAC-3'). The product was cloned between the NotI and SalI sites of pFLAG-CMV-6c expression Vector (Sigma).

### RNA interference

The MCF7 cells ( $3 \times 10^5$ ) were seeded in six-well culture plates. After 24 hours, gene specific shRNA (Sigma, Mission human genome shRNA library) and shRNA against eGFP (Sigma, SHC005) as a control (2µg/well) were transfected using Lipofectamine-3000 reagent (Thermo Fisher Scientific, L3000-008) as per the manufacturer's instructions. After 36 hours of transfection, cells were selected with 0.8 µg/ml puromycin (Sigma, P9620) for 72 hours. For ChIP, the transfection with gene specific as well as control shRNA was done in the 100mm culture dish (8µg/plate).

### Oligo sequence of shRNAs

|                |                                                                    |
|----------------|--------------------------------------------------------------------|
| eGFP shControl | 5'-CCGGTACAACAGCCACAACGTCTATCTCGAGATAGACGTTGTGGCTGTTGTATTTTT-3'    |
| shBORIS        | 5'-CCGGGTCCGACACAGGCGCTATAAACTCGAGTTTATAGCGCCTGTGTCGGACTTTTTG-3'   |
| shDNMT3B       | 5'-CCGGCCATGCAACGATCTCTCAAATCTCGAGATTTGAGAGATCGTTGCATGGTTTTTG-3'   |
| shDNMT3A       | 5'-CCGGCCACCAGAAGAAGAGAAGAATCTCGAGATTCTCTCTTCTCTGTTGGTTTTTG-3'     |
| shDNMT1        | 5'-CCGGCGACTACATCAAAGGCAGCAACTCGAGTTGCTGCCTTTGATGTAGTCGTTTTT-3'    |
| shCTCF         | 5'-GTACCGGTATGATTTCCATCGACATTTCTCGAGAAATGTCGATGGGAAATCATATTTTTG-3' |

## **Quantitative RT-PCR**

Total RNA was extracted from cultured MCF7 cells, MDA-MB-231 cells and human breast tissue sample using the RNeasy kit (Qiagen, 74106) and Trizol (Ambion, 15596018) respectively according to manufacturer's instruction. RNA was quantified using Nanodrop (Thermo Fisher Scientific, ND8000). 1µg of total RNA was reverse transcribed by iScript cDNA synthesis kit (BioRad, 17088) as per the manufacturer's instructions. Amplification reactions were prepared in duplicate using SYBR green (Affymetrix, 75665) and amplification was performed on light cycler 480 II (Roche) according to manufacturer's instruction. Primers were designed using IDT PrimerQuest tool (<https://www.idtdna.com/>). The primers used in this study are mentioned in the *SI Appendix* Table S1. The average cycle thresholds from three independent biological replicate samples were calculated and normalized to housekeeping control gene *RPS16*. Normalization was performed using *RPS16* as a normalization control using the formula:  $[2^{-(Ct_{control} - Ct_{target})}]$ . In addition to control gene normalization, constitutive exon normalization was performed for exon-level expression analysis. Student's t-test was used to compare gene/exon expression between two different groups.  $P < 0.05$  was considered as statistically significant.

## **Chromatin immunoprecipitation (ChIP)**

ChIP assays were performed as described previously (1). Briefly, sonicated chromatin (25 µg) was immunoprecipitated by adding the antibody of interest followed by overnight incubation at 4 °C. The following antibodies were used for ChIP: Anti-BORIS (Millipore ABE631, batch no. VP1403050), Anti- RNA Pol II (Millipore 17672, batch no. 2080890), Anti- CTCF (Millipore 1710044, batch no. 2377389), Normal Rabbit IgG (Millipore 12370, batch no. 2295402), Normal mouse IgG (Calbiochem NI03, batch no. D00151120). Immunoprecipitated fractions and 5% input were analyzed by quantitative real-time PCR in duplicate using the SYBR Green Master Mix (Affymetrix, 75665) and specific primers

(mentioned in the *SI Appendix* Table S1) across the exonic regions. H19 Imprint Control Region (ICR) (2) was used as a positive control for CTCF ChIP. Each experiment was performed at least three times. Normalization was performed to input using the formula:  $[2^{-(Ct_{input} - Ct_{immunoprecipitation})}]$ . Resultant values were further normalized relative to the rabbit or mouse Ig control IP values for the primer set. Student's t-test was used to identify the significance between two different groups.  $P < 0.05$  was considered statistically significant.

### **Methylated DNA immunoprecipitation (MeDIP)**

Genomic DNA was isolated from MCF7 cells and breast tumor tissue sample using DNA isolation kit (Sigma, G1N70) and DNazol (Thermo Fisher Scientific, 10503-027) respectively, according to manufacturer's instruction. MeDIP assays were performed as described previously (1). Briefly, 2  $\mu$ g of sonicated DNA was processed and incubated with 5-Methyl cytosine antibody (Active Motif 39649, batch no. 20414013) and Normal mouse IgG antibody (Calbiochem NI03, batch no. D00151120) for overnight at 4<sup>0</sup>C.

Immunoprecipitated fractions and 5% input were analyzed by quantitative real-time PCR in duplicate using the SYBR Green Master Mix (Affymetrix, 75665) and specific primers (mentioned in the *SI Appendix* Table S1) across the exonic regions. Normalization was performed to input using the formula:  $[2^{-(Ct_{input} - Ct_{immunoprecipitation})}]$ . Resultant values were further normalized relative to the mouse Ig control IP values for the primer set. Student's t-test was used to identify the significance between two different groups.  $P < 0.05$  was considered statistically significant.

### **Western blot**

The MCF7 cells/MDA-MB-231 cells/ HMEC cells/homogenized tissues were lysed in NP-40 buffer (150mM NaCl, 1% NP-40, 50mM Tris-HCl pH8.0, 1X Protease inhibitor). The following antibodies were used for western blotting: Anti- PKM1 (Cell Signaling Technology 7067S, batch no.1), Anti-PKM2 (Cell Signaling Technology 4053S, batch no. 3), Anti-

BORIS (Millipore ABE631, batch no. VP1403050), Anti-DNMT1 (Abcam ab87656, batch no. GR215476-4), Anti- DNMT3A (Abcam ab2850, batch no. GR218985-4), Anti-DNMT3B (Abcam ab13604, batch no. GR236376-4), and Anti Flag (Sigma F7425). Anti-GAPDH (Cell Signaling Technology 5174S, batch no. 6), Anti- alpha Tubulin (Abcam ab126165, batch no. GR106527-20) and Anti-Ran (BD Biosciences 610340, batch no. 3004982) were used as loading controls for protein assays.

### **Generation of BORIS binding mutant clone using CRISPR/Cas9:**

MCF7 cells were subjected to sgDNA directed Cas9 mediated DNA double strand break in BORIS binding site. The sgDNA sequence (5'-TGGTAATGGGCGCCAGGCGG-3') was cloned at *BbsI* site into pSpCas9 (BB) (Addgene plasmid ID: 42230). During double strand break repair, two alleles can be repaired by two independent NHEJ (non-homologous end joining) events in the same cell and thus generates a compound heterozygote (3, 4) where two alleles have two different mutations. The correct clone was confirmed by Sanger sequencing and cotransfected into MCF7 cells along with GFP expressing plasmid. After 36 hours of transfection, GFP positive cells were sorted using cell sorter into 96-well plate. DNA was isolated from individual clones and 600 bp region near the sgDNA targeting sequence was amplified using the primers (5' TCACAGGCACTTGGTGAAGGAC-3' and 5'-GATCCAAATGTTCTGACATTCC-3'). Sanger sequencing was performed from individual clones and analyzed for deletion. The clones that showed deletion in BORIS binding site were then checked for integrity at three top off-target sites of the sgDNA identified by sgDNA designing website (<http://crispr.mit.edu>). For further experiments using CRISPR deletion clone, clones that showed no modification after Cas9-sgDNA transfection was used as a control.

### **Cell viability assay**

The MCF7 cells ( $3 \times 10^5$ ) were transfected with BORIS shRNA and shRNA against eGFP (Sigma, SHC005) as a control in six-well culture plates. After selection of transfected cells with puromycin, shBORIS transfected cells were transfected with PKM2 overexpression plasmid. After 24 hours, cells ( $4 \times 10^3$ ) were seeded in 96 well culture plates and were cultured for 24 hours, 48 hours, 60 hours, and 72 hours (in triplicate for each condition). Cell growth was determined by measuring the conversion of MTT Tetrazolium salt (Sigma, M2128) to MTT formazan. In brief, 20 $\mu$ l of MTT stock solution (2mg/ml) was added to each well and incubated for two to three hours. After the incubation time, formazan crystals formed in the cells were solubilized using lysis buffer (Isopropanol, 0.1% SDS, 4mM HCl). Numbers of viable cells were measured by a plate reader (BioTek Eon, 11-120-611) at an optical density of 570 nm.

#### **Wound healing assay**

The MCF7 cells ( $3 \times 10^5$ ) were seeded in six-well culture plates. After 24 hours, shBORIS and shControl (2 $\mu$ g/well) were transfected using Lipofectamine reagent (Thermo Fisher Scientific, L3000-008) as per the manufacturer's instructions. After selection of transfected cells with puromycin, shBORIS transfected cells were transfected with PKM2 overexpression plasmid. After 24 hours, the cell monolayer was scratched using a sterile 10 $\mu$ l pipette tip and washed with 1XPBS two times to remove cellular debris. Three wounded areas in each well were marked on the bottom of plates and images were captured at 24 hours, 48 hours, 72 hours, and 96 hours with an inverted microscope. The gap lengths were calculated from the images using ImageJ software.

#### **Colony forming assay**

The MCF7 cells ( $3 \times 10^5$ ) were seeded in six-well culture plates. After 24 hours, shBORIS and shControl (2 $\mu$ g/well) were transfected using Lipofectamine reagent (Thermo Fisher Scientific, L3000-008) as per the manufacturer's instructions. The colony forming assay was

done as described earlier (5). Briefly, after 48 hours of transfection, cells were trypsinized, and  $1 \times 10^3$  cells were seeded in the new 12-well plate. After 24 hours of seeding, cells were selected with  $0.8 \mu\text{g/ml}$  puromycin for seven days. At the time of staining, cells were fixed using methanol and acetic acid (3:1) for five minutes. After fixation, cells were washed with 1x PBS three times. After washing cells were stained with 0.05% crystal violet stain.

### **Lactate assay**

The MCF7 cells ( $3 \times 10^5$ ) were transfected with respective shRNA and shRNA against eGFP (Sigma, SHC005) as a control in six-well culture plates. After selection of transfected cells with puromycin, shBORIS transfected cells were transfected with PKM2 overexpression plasmid. The cells were trypsinized 48 hours after transfection of PKM2 overexpression plasmid, and cell counting was performed using trypan blue (Himedia, TC193). An equal number of cells were homogenized in the presence of lactate assay buffer and centrifuged at 13,000g for 10 minutes. Similarly, for the lactate quantification after Aza treatment, the MCF7 cells ( $3 \times 10^5$ ) were treated with  $10 \mu\text{M}$  5-Aza-2'-deoxycytidine (Sigma, 83656) for 6 days in six-well cell culture plates. After treatment, cell counting was performed using trypan blue and equal numbers of cells were homogenized in the presence of lactate assay buffer. For lactate quantification in tumor samples, 50 mg of tissue sections were crushed using liquid nitrogen and homogenized with lactate assay buffer. Lactate quantification was performed using commercially available lactate assay kit (Sigma, MAK064) in a 96-well plate as per the manufacturer's instruction. Lactate level was measured with a plate reader (BioTek Eon, 11-120-611) at an optical density of 570 nm.

### **Glucose uptake assay**

The MCF7 cells ( $3 \times 10^5$ ) were transfected with respective shRNA and shRNA against eGFP (Sigma, SHC005) as a control in six-well cell culture plates. After selection of transfected cells with puromycin, shBORIS transfected cells were transfected with PKM2 overexpression

plasmid. The cells were trypsinized 48 hours after transfection of PKM2 overexpression plasmid, and cell counting was performed using trypan blue (Himedia, TC193). An equal number of cells were homogenized in the presence of glucose assay buffer and centrifuged at 13,000g for 10 minutes. Similarly, the MCF7 cells ( $3 \times 10^5$ ) were also treated with  $10 \mu\text{M}$  5-Aza-2'-deoxycytidine (Sigma, 83656) in six-well cell culture plates for 6 days. After treatment, cell counting was performed using trypan blue and equal numbers of cells were homogenized in the presence of glucose assay buffer. Glucose level quantification was performed using commercially available glucose assay kit (Abcam ab65333) in a 96-well plate as per the manufacturer's instruction. Glucose level was measured with a plate reader (BioTek Eon, 11-120-611) at an optical density of 570 nm.

### **Caspase 3/7 assay**

The MCF7 cells ( $3 \times 10^5$ ) were seeded in six-well culture plates. After 24 hours, shBORIS and shControl ( $2 \mu\text{g}/\text{well}$ ) were transfected using Lipofectamine reagent (Thermo Fisher Scientific, L3000-008) as per the manufacturer's instructions. After selection of transfected cells with puromycin, shBORIS transfected cells were transfected with PKM2 overexpression plasmid. After 72 hours of transfection, cells were trypsinized and seeded ( $10^3$ ) in 96 well plate. After 24 hours, Caspase 3/7 activation in shControl and shBORIS transfected cells was measured using the Caspase-Glo 3/7 assay (Promega, G8090) as recommended by the manufacturer. Luminescence readings were taken using Glomax multi-detection system (Promega). Hydrogen peroxide ( $20 \mu\text{M}$ ) treated MCF7 cells were used as a positive control. Similarly, Mut BBS MCF7 cells were transfected with PKM2 overexpression plasmid and Caspase- Glo 3/7 assay was performed in Wt BBS and Mut BBS MCF7 cells.

### **Human Transcriptome Array 2.0 array profiling**

Total RNA samples were isolated from shControl and shBORIS transfected cells using RNeasy kit (Qiagen, 74106). RNA integrity was analyzed using Bioanalyzer (Agilent).



Biotinylated cDNAs were prepared from a minimal 100ng of total RNA using Life Technologies (Ambion) WT-plus RNA Amplification system. Following the amplification, cDNA fragmentation was done, and 5.5µg of fragmented cDNAs were hybridized for 16 hr at 45<sup>0</sup>C on Affymetrix GeneChip Human Transcriptome Array 2.0 (HTA2.0) chips. The chips were washed and stained in the Affymetrix Fluidics Station 450. After hybridization, the fluorescence intensity of the arrays was scanned using the Affymetrix Scanner 7G. The raw data was analyzed using Affymetrix expression console and Transcriptome console software.

### **Human Transcriptome Array 2.0 array data analysis**

Raw data were normalized by SST-RMA method using Expression Console software. SST-RMA normalized HTA2.0 array data files were used for the global alternative splicing analysis. Transcriptome Analysis Console was used to identify the alternative splicing pattern between shBORIS and shControl transfected MCF7 cells. Splicing Index (linear)  $\leq -2$  or Splicing Index (linear)  $\geq +2$ ;  $P < 0.05$ . For breast cancer HTA2.0 array profile (GSE76250) (6, 7), we used expression profile of 165 tumor samples and 33 normal breast tissue samples for splicing analysis. Splicing pattern was identified by comparing normal breast versus breast tumor tissues with splicing cut-off index  $\leq -1.2$  and  $\geq +1.2$ ;  $P < 0.05$ . Splicing Index (SI) is the measure of exon inclusion and exclusion levels in alternative splicing analysis and was defined as the ratio of normalized exon intensity under two conditions. Normalized exon intensity (NI) is the ratio of exon intensity to the gene intensity. In brief, the SI was calculated using the following formula (8),

([https://tools.thermofisher.com/content/sfs/brochures/id\\_altsplicingevents\\_technote.pdf](https://tools.thermofisher.com/content/sfs/brochures/id_altsplicingevents_technote.pdf));

$$\text{Normalized exon intensity (NI)} = \frac{\text{Exon intensity}}{\text{Gene level}}$$

$$\text{Splicing Index (SI)} = \log_2 \frac{\text{Sample 1 NI}}{\text{Sample 2 NI}}$$

Where exon intensity is the expression level of the probe, and gene intensity represents the overall transcript cluster of a gene. The positive SI means inclusion whereas negative SI

means exclusion. In addition to these measures, following criteria's were followed during splicing analysis: (1), Probe Selection Region (PSR)/Junction must be expressed in at least one condition, and (2), a gene must contain at least one PSR.

### **TCGA data analysis**

The Level3 RNA-SeqV2 data for gene and exon level expression from normal and breast cancer tissues were downloaded from The Cancer Genome Atlas (TCGA) data portal (<https://tcga-data.nci.nih.gov/tcga/>). Downloaded level3 seq files were integrated to give gene as well as exon expression profile separately. Gene expression values were extracted from gene level data for *BORIS*. Fragments Per Kilobase of transcript per Million mapped reads (FPKM) and Transcripts per million (TPM) values were used to plot the *BORIS* expression in breast cancer samples. First we calculated reads per kilobase from TCGA data and count up all the reads per kilobase values in a sample and divided by  $1 \times 10^6$  to calculate the transcripts per million reads. *PKM* isoform-specific expression values were obtained from exon level data. Based on the isoform exon information, we assigned uc002att.1, uc002atv.1, uc002atw.1, uc002atx.1, uc010ukj.1, uc010ukk.1, and uc010bit.1 to *PKM1* and uc002atr.1, uc002ats.1, uc002atu.1, uc002aty.1, uc010biu.1, uc010uki.1, and uc002atz.1 to *PKM2* (9). These values were summed up to give *PKM1* and *PKM2* expression levels respectively.

### **ChIP-Sequencing data analysis**

The ChIP-sequencing data were downloaded from GEO data portal. Downloaded ChIP-seq raw files (.SRA) (GSM1817668 and GSM1817669) were converted into FASTQ files using SRA tool kit. Sequencing reads were aligned to hg19 assembly using BOWTIE2 tool. MACS tool was used to call the peaks. IGV was used to visualize the peaks from the .bigwig file. Cistrome db tool was used to identify the enriched motifs in the *BORIS* ChIP seq data.

### **Nucleosome occupancy assay**

Nucleosome occupancy assay was performed according to the previously described protocol (10) in shControl and shDNMT3B transfected MCF7 cells. Cells were cross-linked with 1% formaldehyde for 10 minutes at room temperature. The reaction was quenched by adding glycine to a final concentration of 0.125M at room temperature for 5 min with rotation. The cells were washed twice in chilled PBS and harvested by spinning down at 1200 rpm for 2 minutes at 4°C. The pellet was resuspended in cold buffer A (10mM HEPES pH 7.9, 10mM KCl, 1.5mM MgCl<sub>2</sub>, 0.34M Sucrose, 10% Glycerol, 1X Protease inhibitor, 1mM DTT) to which Triton X-100 was added to a final concentration of 0.1%. The cells were then incubated for 10 min in ice and were spun down at 1300 x g for 5 min at 4°C. The pellet was again resuspended in buffer B (0.3mM EDTA, 0.2mM EGTA, 1mM DTT, 1X Protease inhibitor) and after incubating in ice for 30 minutes; the cells were spun down at 1700xg for 5 min at 4°C. Then, the pellet is resuspended in MNase buffer (50mM Tris-HCl pH 7.4, 25mM KCl, 4mM MgCl<sub>2</sub>, 12.5% glycerol, 1mM CaCl<sub>2</sub>). The samples were divided into equal volumes (~500 µl), and 5% of the samples were taken from each tube as input. 0U/ml and 400U/ml (2 µl) of MNase were added accordingly in different tubes and was incubated for 10 min at 37°C in water bath. The digestion reaction was stopped by adding equivalent volume of stop buffer (100mM EDTA, 100mM EGTA). The DNA was spun down at 16000 x g for 2 minutes. The pellet, as well as the input DNA, was resuspended in 150 µl of elution buffer (50mM Tris-HCl pH 8.0, 10mMEDTA, 1% SDS, 50mM NaHCO<sub>3</sub>). The DNA was then treated with 1 ml RNaseA (1mg/ml, Ambion) at 37°C for 30 minutes. Reverse-crosslinking was done by adding 1 ml proteinase K (20mg/ml, Ambion) and incubating at 65°C for 4 h or overnight. Eluted DNA was purified with QIAquick PCR purification (Qiagen). The digested DNA sample (400U/ml of MNase treated sample) was loaded on 1.2% agarose gel with 0.5% Tris-EDTA buffer, and the mononucleosome-sized fragments were cut out and were further

gel purified using Gel Extraction Kit (Qiagen). DNA was subsequently checked by quantitative PCR using primers for the regions to be assayed for nucleosome density.

### **Immunofluorescence**

Immunofluorescence was performed as described previously (11). Wt BBS and Mut BBS MCF7 cells were plated in 12 well plate. After 24 hours, cells were washed with 1X PBS followed by fixation with 4% formaldehyde for 10 minutes at room temperature. Cells were then washed with PBS three times for 5 minutes at room temperature, and permeabilized by PBS containing 0.1% Triton-X100 (PBST). The cells were then blocked by 1% goat serum, followed by overnight incubation with PKM1 and PKM2 antibody in the blocking solution (PBST). The cells were washed with PBS and incubated with the fluorescein-conjugated anti rabbit secondary antibody (Invitrogen, A11036, batch no. 997761) for 1 hour, followed by washing with PBS. Then cells were stained with DAPI (Invitrogen, D1306, batch no. 1673432) for 5 minutes and washed with PBS. The coverslips were mounted inverted on a glass slide with fluoroshield mounting media (Sigma, F6182). Cells were then analyzed by ApoTome Axio microscope.

### **References:**

1. Shukla S, *et al.* (2011) CTCF-promoted RNA polymerase II pausing links DNA methylation to splicing. *Nature* 479(7371):74-79.
2. Bell AC & Felsenfeld G (2000) Methylation of a CTCF-dependent boundary controls imprinted expression of the Igf2 gene. *Nature* 405(6785):482-485.
3. Wang H, *et al.* (2013) One-step generation of mice carrying mutations in multiple genes by CRISPR/Cas-mediated genome engineering. *Cell* 153(4):910-918.
4. Ran FA, *et al.* (2013) Genome engineering using the CRISPR-Cas9 system. *Nat Protoc* 8(11):2281-2308.
5. Narayanan SP, *et al.* (2015) Integrated genomic analyses identify KDM1A's role in cell proliferation via modulating E2F signaling activity and associate with poor clinical outcome in oral cancer. *Cancer Lett* 367(2):162-172.
6. Liu YR, *et al.* (2016) Comprehensive Transcriptome Profiling Reveals Multigene Signatures in Triple-Negative Breast Cancer. *Clin Cancer Res* 22(7):1653-1662.
7. Jiang YZ, *et al.* (2016) Transcriptome Analysis of Triple-Negative Breast Cancer Reveals an Integrated mRNA-lncRNA Signature with Predictive and Prognostic Value. *Cancer Res* 76(8):2105-2114.
8. Chen L (2011) Statistical and Computational Studies on Alternative Splicing. *Handbook of Statistical Bioinformatics*, eds Lu HH-S, Schölkopf B, & Zhao H (Springer Berlin Heidelberg, Berlin, Heidelberg), pp 31-53.

9. Desai S, *et al.* (2014) Tissue-specific isoform switch and DNA hypomethylation of the pyruvate kinase PKM gene in human cancers. *Oncotarget* 5(18):8202-8210.
10. Bryant GO (2012) Measuring nucleosome occupancy in vivo by micrococcal nuclease. *Methods Mol Biol* 833:47-61.
11. Das AM, Eggermont AM, & ten Hagen TL (2015) A ring barrier-based migration assay to assess cell migration in vitro. *Nat Protoc* 10(6):904-915.

## SI Appendix Figures

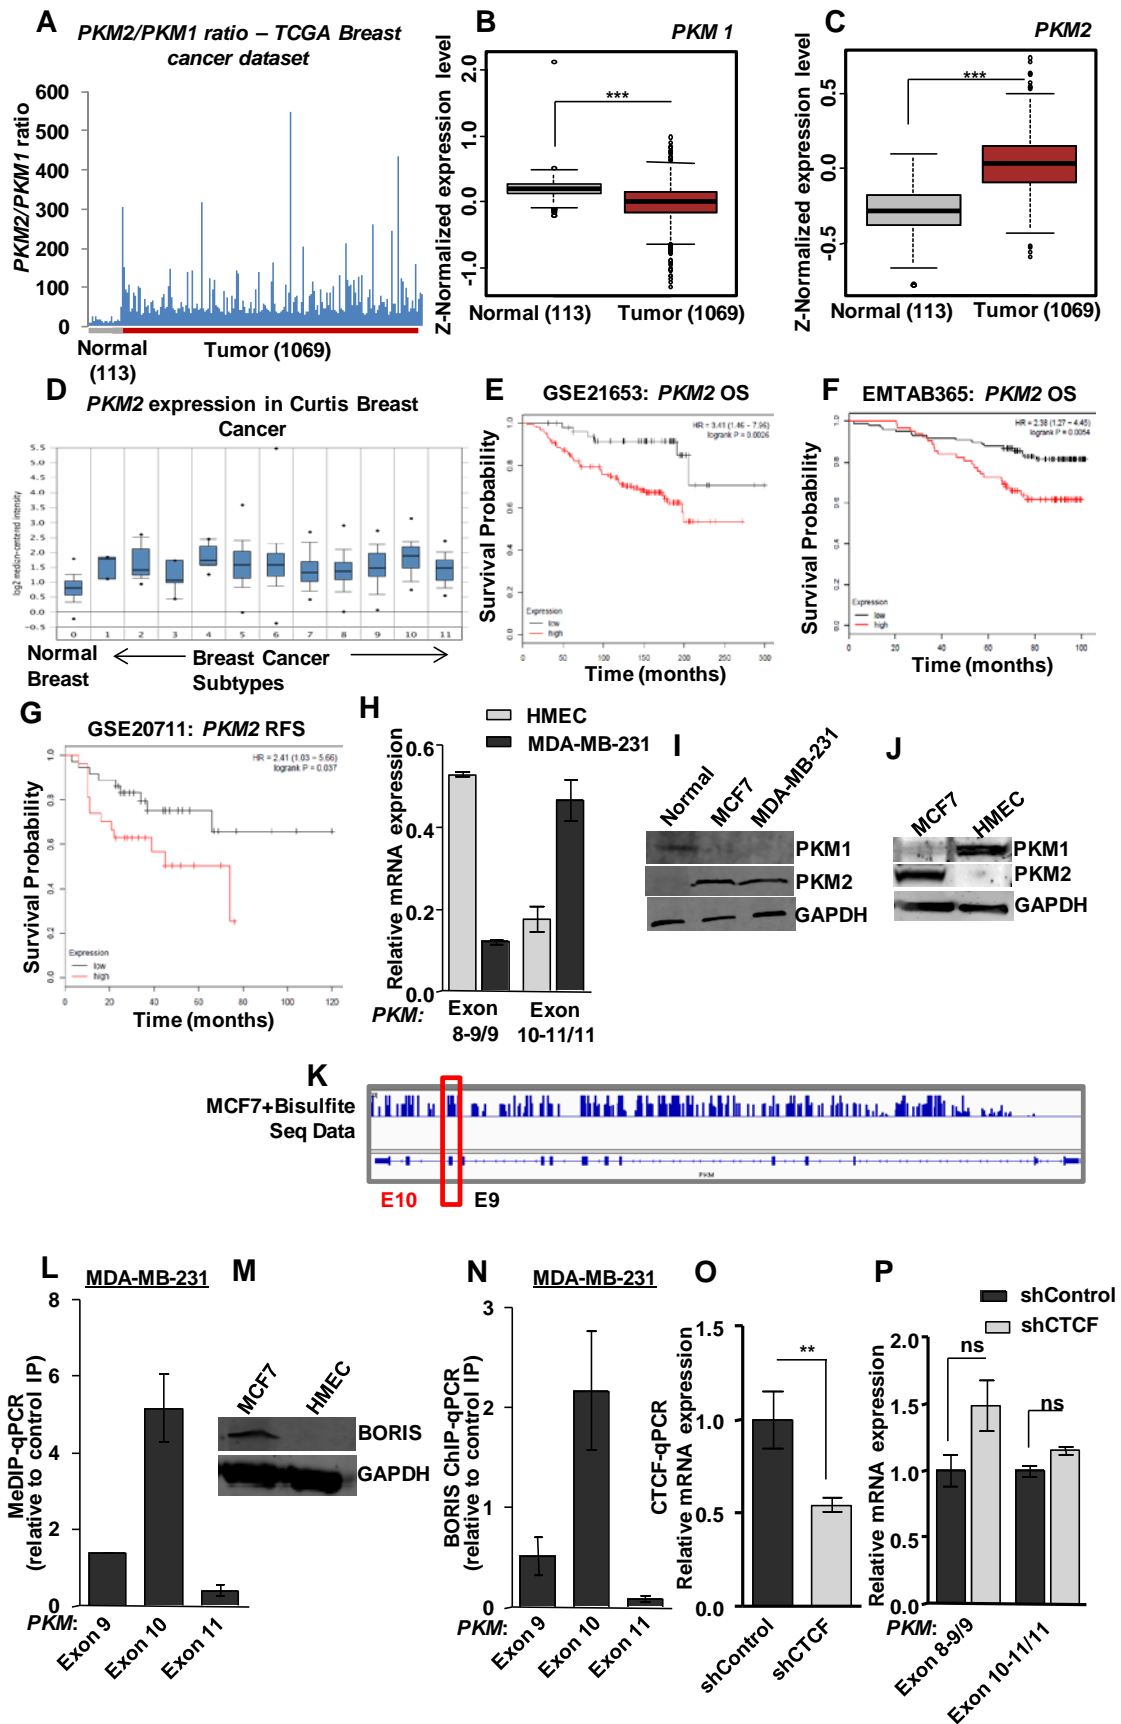

**Fig. S1. Increased *PKM2* isoform expression correlates with higher DNA methylation at exon 10 and leads to poor survival outcome in breast cancer.**

(A) Ratio of *PKM1* and *PKM2* isoform in normal and breast tumor profiles (TCGA RNASeqV2.level 3; n=1182), indicating higher *PKM2/PKM1* ratio in tumor profiles. (B-C) mRNA expression level of (B) *PKM1* isoform and (C) *PKM2* in normal and breast tumor profiles (Fold change: -0.76; TCGA RNASeqV2.level 3; n=1182). (D) *PKM2* expression in Curtis breast cancer profile analyzed in Oncomine. See *SI Appendix* Table S2. (E-G) Kaplan-Meier survival analysis of *PKM2* expression in breast cancer profiles, (E) GSE21653 (HR=3.41; p=0.0026) (F) EMTAB365 (HR=2.38; p=0.0054) (G), GSE20711 (HR=2.41; p=0.037). Red color represents high expression, black color represents low expression of *PKM2* (OS=Overall Survival, RFS=Recurrence Free Survival, HR=Hazard ratio). (H) *RPS16* normalized qRT-PCR data in MDA-MB-231 breast cancer cells and HMEC cells (Fig. 1C) using the indicated exon junction specific primers. (I) Western blot for *PKM1* and *PKM2* proteins expression in MCF7 and MDA-MB-231 breast cancer cells. (J) Western blot for *PKM1* and *PKM2* protein expression in MCF7 and HMEC cells. GAPDH acts as a loading control. (K) WGBS data analysis (GSM1328112) shows higher methylation at exon 10 region compared to the neighboring exons of *PKM* gene. (L) Methylated DNA immunoprecipitation (MeDIP) in MDA-MB-231 genomic DNA using 5methyl-cytosine antibody followed by qPCR relative to input and mouse IgG. (M) Western blot for BORIS protein expression in MCF7 and HMEC cells. GAPDH acts as a loading control. (N) BORIS chromatin immunoprecipitation (ChIP) in MDA-MB-231 followed by qPCR relative to input and mouse IgG. (O) *RPS16* normalized qRT-PCR in MCF7 cells transfected with shRNA against CTCF and control shRNA to detect *CTCF* mRNA levels. (P) *RPS16* normalized qRT-PCR data from MCF7 cells transfected with shCTCF versus shControl transfected cells using indicated exon junction spanning primers. Three independent experiments were conducted. Graphs show mean values  $\pm$  SD. *P* as calculated using two-tailed Student's t-test, \* *P* <0.05, \*\* *P* <0.01, \*\*\* *P* <0.001, ns=non-significant.

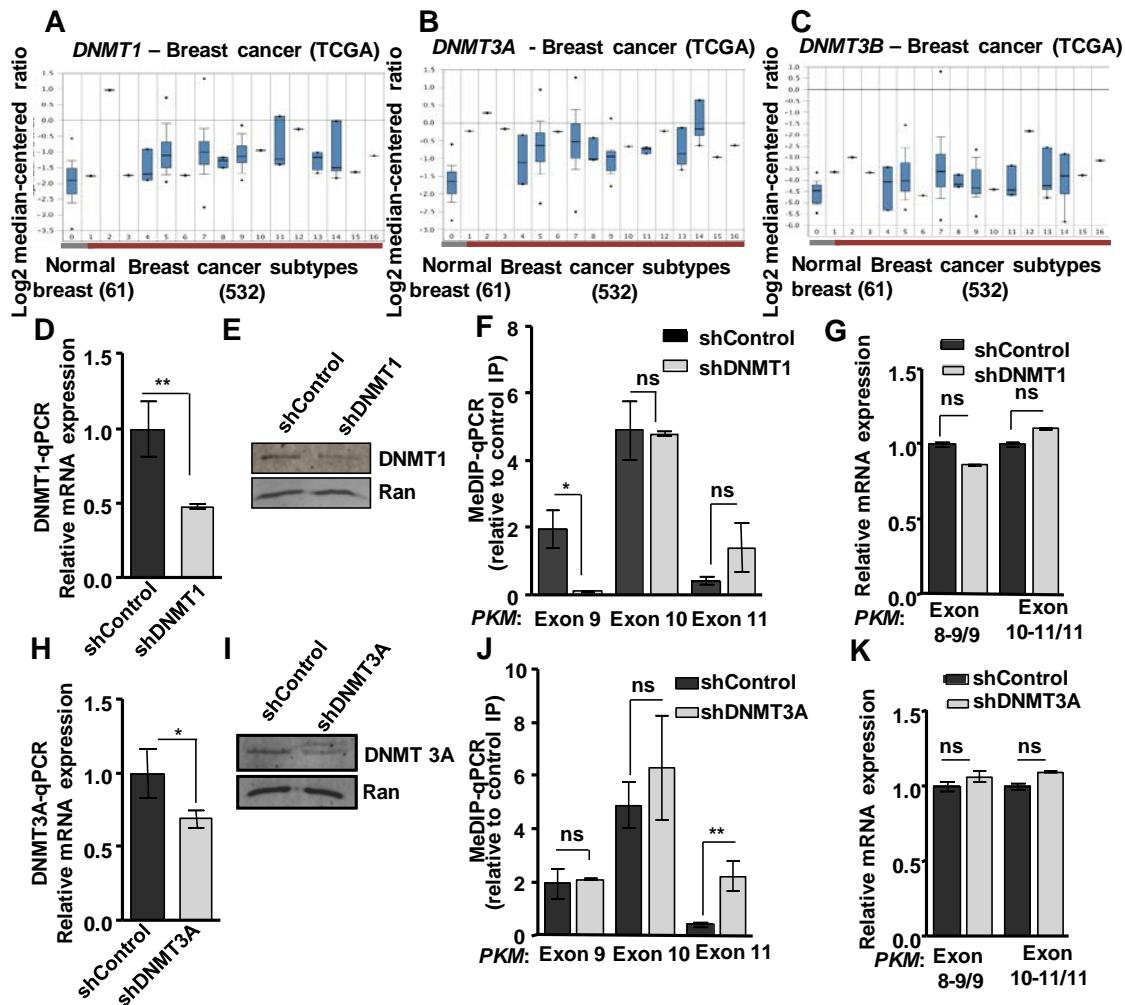

**Fig. S2. DNMT expression in breast cancer and their role in *PKM* alternative splicing.**

(A, B, C) Gene expression data analysis of DNA Methyl Transferases (*DNMT1*, *DNMT3A*, *DNMT3B*) in different breast cancer subtypes (A), (B), (C) analyzed from TCGA breast cancer profile using Oncomine. (Breast cancer subtypes, fold change, statistical significance are presented in *SI Appendix* Table S3). (D) *RPS16* normalized qRT-PCR in MCF7 cells transfected with shRNA against *DNMT1* and control shRNA to detect *DNMT1* mRNA levels. (E) Western blot for DNMT1 expression in cells from shControl and shDNMT1 transfected MCF7 cells. Ran acts as a loading control. (F) MeDIP and qPCR relative to input and mouse IgG in MCF7 cells transfected with shRNA against *DNMT1* versus shControl cells. (G) *RPS16* normalized qRT-PCR data from MCF7 cells transfected with shDNMT1 versus shControl transfected cells using indicated exon junction specific primers. (H) *RPS16* normalized qRT-PCR in MCF7 cells transfected with shRNA against *DNMT3A* and control shRNA to detect *DNMT3A* mRNA levels. (I) Western blot for DNMT3A expression in cells from shDNMT3A transfected MCF7 cells. Ran acts as a loading control. (J) MeDIP and qPCR relative to input and mouse IgG in MCF7 cells transfected with shRNA against DNMT3A versus shControl cells. (K) *RPS16* normalized qRT-PCR data from MCF7 cells transfected with shDNMT3A versus shControl transfected cells using indicated exon junction spanning primers. Three independent experiments were conducted, with the mean values  $\pm$



SD. *P* as calculated using two-tailed Student's *t*-test, \* *P* < 0.05, \*\* *P* < 0.01, \*\*\* *P* < 0.001, ns=non-significant.

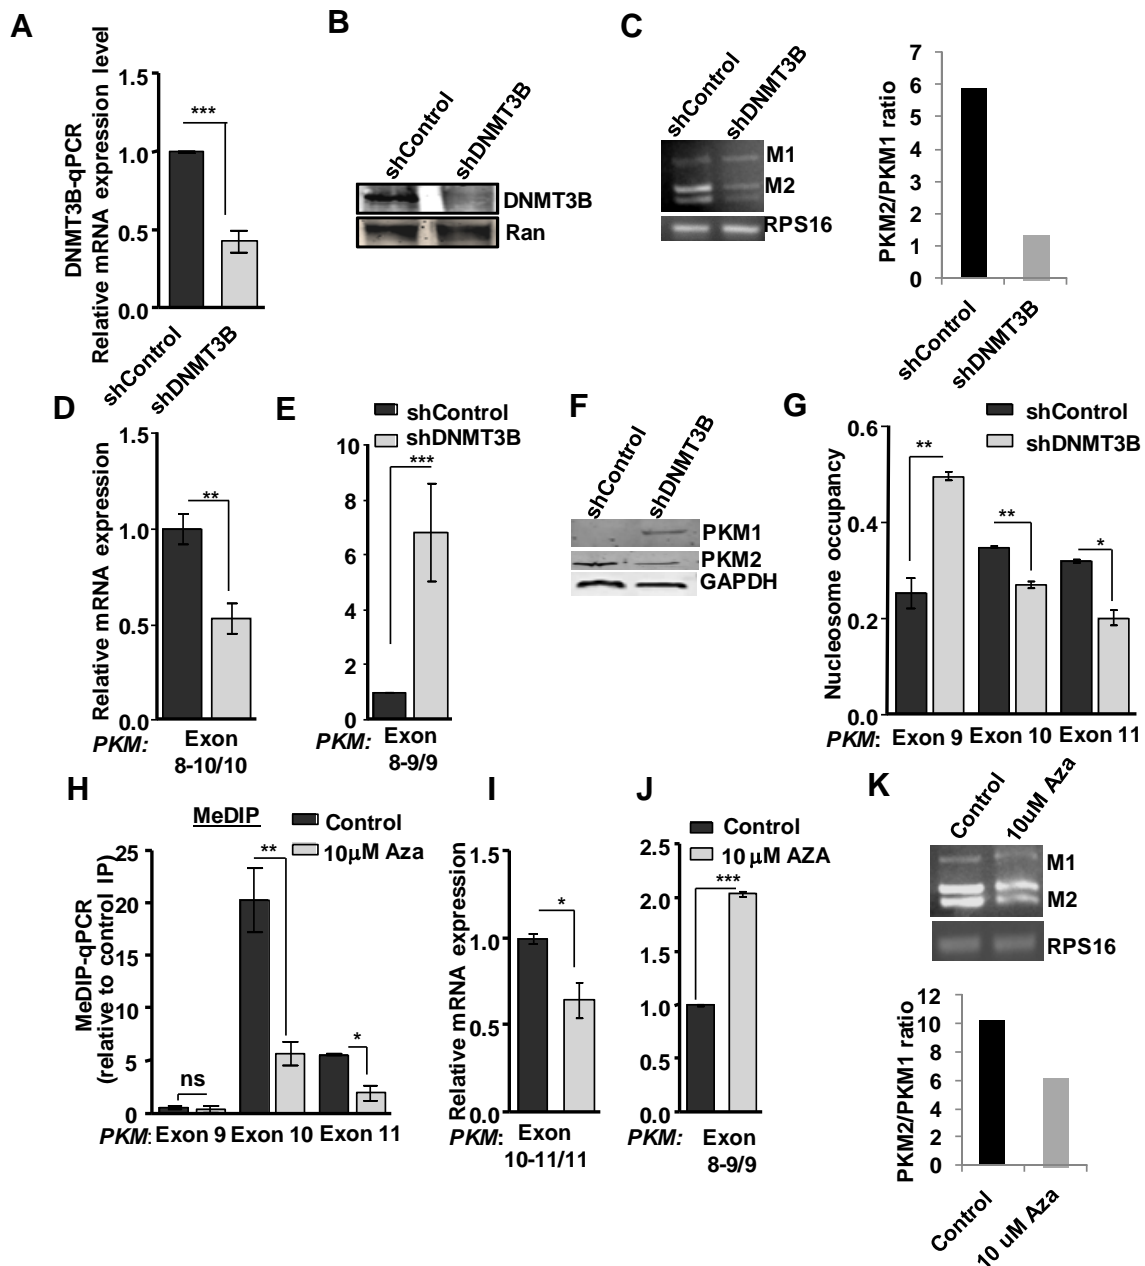

**Fig. S3. Role of DNMT 3B in PKM alternative splicing.**

(A) *RPS16* normalized qRT-PCR in MCF7 cells transfected with shRNA against *DNMT3B* and control shRNA to detect *DNMT3B* mRNA levels. (B) Western blot for *DNMT3B* expression in shControl and shDNMT3B transfected MCF7 cells. Ran acts as a loading control. (C) Semi-quantitative PCR of *PKM* gene in shControl and shDNMT3B cells were followed by PstI digestion in order to distinguish the amplicons. (D) *RPS16* normalized qRT-PCR from shDNMT3B versus shControl transfected MCF7 cells using exon8-10 forward junction and exon 10 reverse primers in order to check the splicing of *PKM* gene. (E) *RPS16* normalized qRT-PCR from shDNMT3B versus shControl transfected MCF7 cells using exon8-9 forward junction and exon 9 reverse primers in order to check the splicing of *PKM*

gene. (F) Western blot for PKM1 and PKM2 protein level expression in shDNMT3B and shControl MCF7 cells. (G) MNase assay was performed in DNMT3B depleted cells. Half of the sample was treated with micrococcal nuclease while the other half remains untreated. Mononucleosomal DNA was extracted from an agarose gel, and qRT-PCR was performed with exon specific primers, normalized to control IP and untreated sample (n=3). (H) MeDIP in MCF7 cells treated with 10 $\mu$ m Aza for 7 days and qRT-PCR relative to input and control IgG. (I-J) *RPS16* normalized qRT-PCR data from MCF7 cells after 10 $\mu$ m Aza treatment for 7 days using (I) exon10-11 forward junction and exon 11 reverse (J) exon8-9 forward junction and exon 9 reverse primers in order to check the splicing of *PKM* gene. (K) Semi-quantitative PCR of *PKM* gene in control and Aza treated MCF7 cells followed by PstI digestion in order to distinguish the amplicons. Three independent experiments were conducted, with the mean values  $\pm$  SD. *P* as calculated using two-tailed Student's t-test, \* *P* <0.05, \*\* *P* <0.01, \*\*\* *P* <0.001, ns=non-significant.

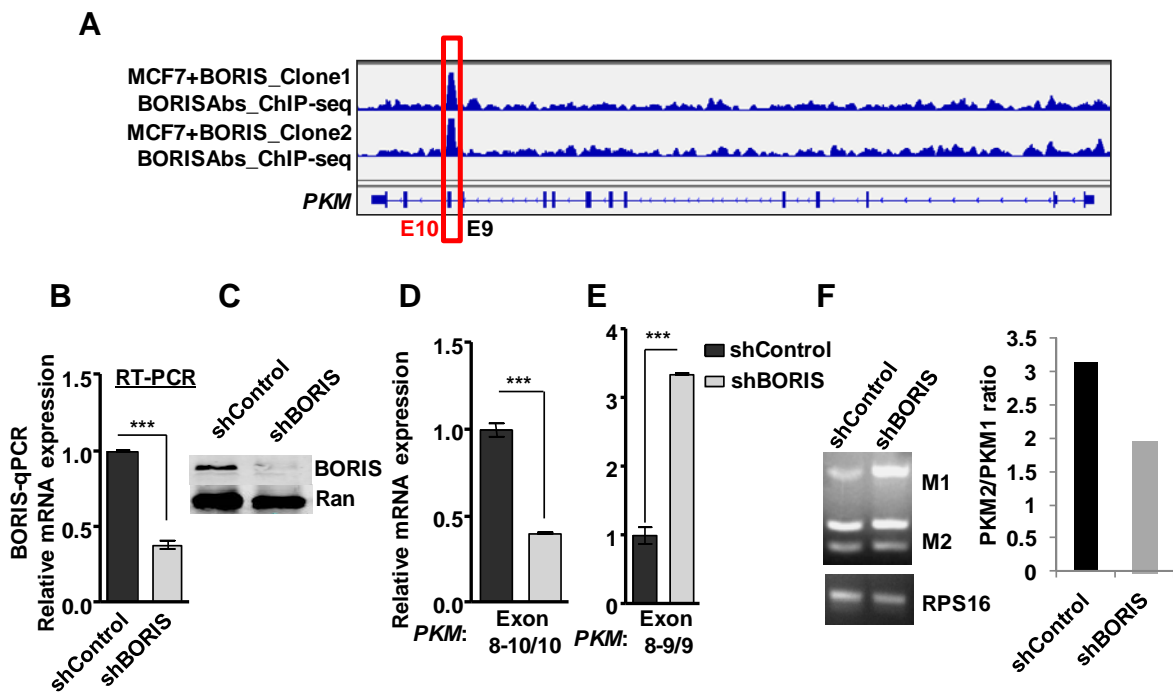

**Fig. S4. BORIS regulates *PKM* splicing.**

(A) BORIS ChIP-seq analysis (GSM1817668 and GSM1817669) in MCF7 cells to show the enrichment of BORIS at the exon 10 of *PKM* gene. Red color box indicates the enrichment of BORIS at the exon 10 over the exon 9 of *PKM* gene. (B) *RPS16* normalized qRT-PCR in MCF7 cells transfected with shRNA against BORIS and control shRNA to detect *BORIS* mRNA levels. (C) Protein expression of BORIS in shBORIS and shControl transfected MCF7 cells. Ran acts as a loading control. (D) *RPS16* normalized qRT-PCR from shBORIS versus shControl transfected MCF7 cells using exon8-10 forward junction and exon 10 reverse primers in order to check the splicing of *PKM* gene. (E) *RPS16* normalized qRT-PCR from shBORIS versus shControl transfected MCF7 cells using exon8-9 forward junction and exon 9 reverse primers in order to check the splicing of *PKM* gene. (F) Semi-quantitative PCRs of *PKM* gene in shControl and shBORIS cells were followed by PstI digestion in order

to distinguish the amplicons. Three independent experiments were conducted, and graph shows mean values  $\pm$  SD. p as calculated using two-tailed Student's t-test, \* $P < 0.05$ , \*\*  $P < 0.01$ , \*\*\*  $P < 0.001$ , ns=non-significant.

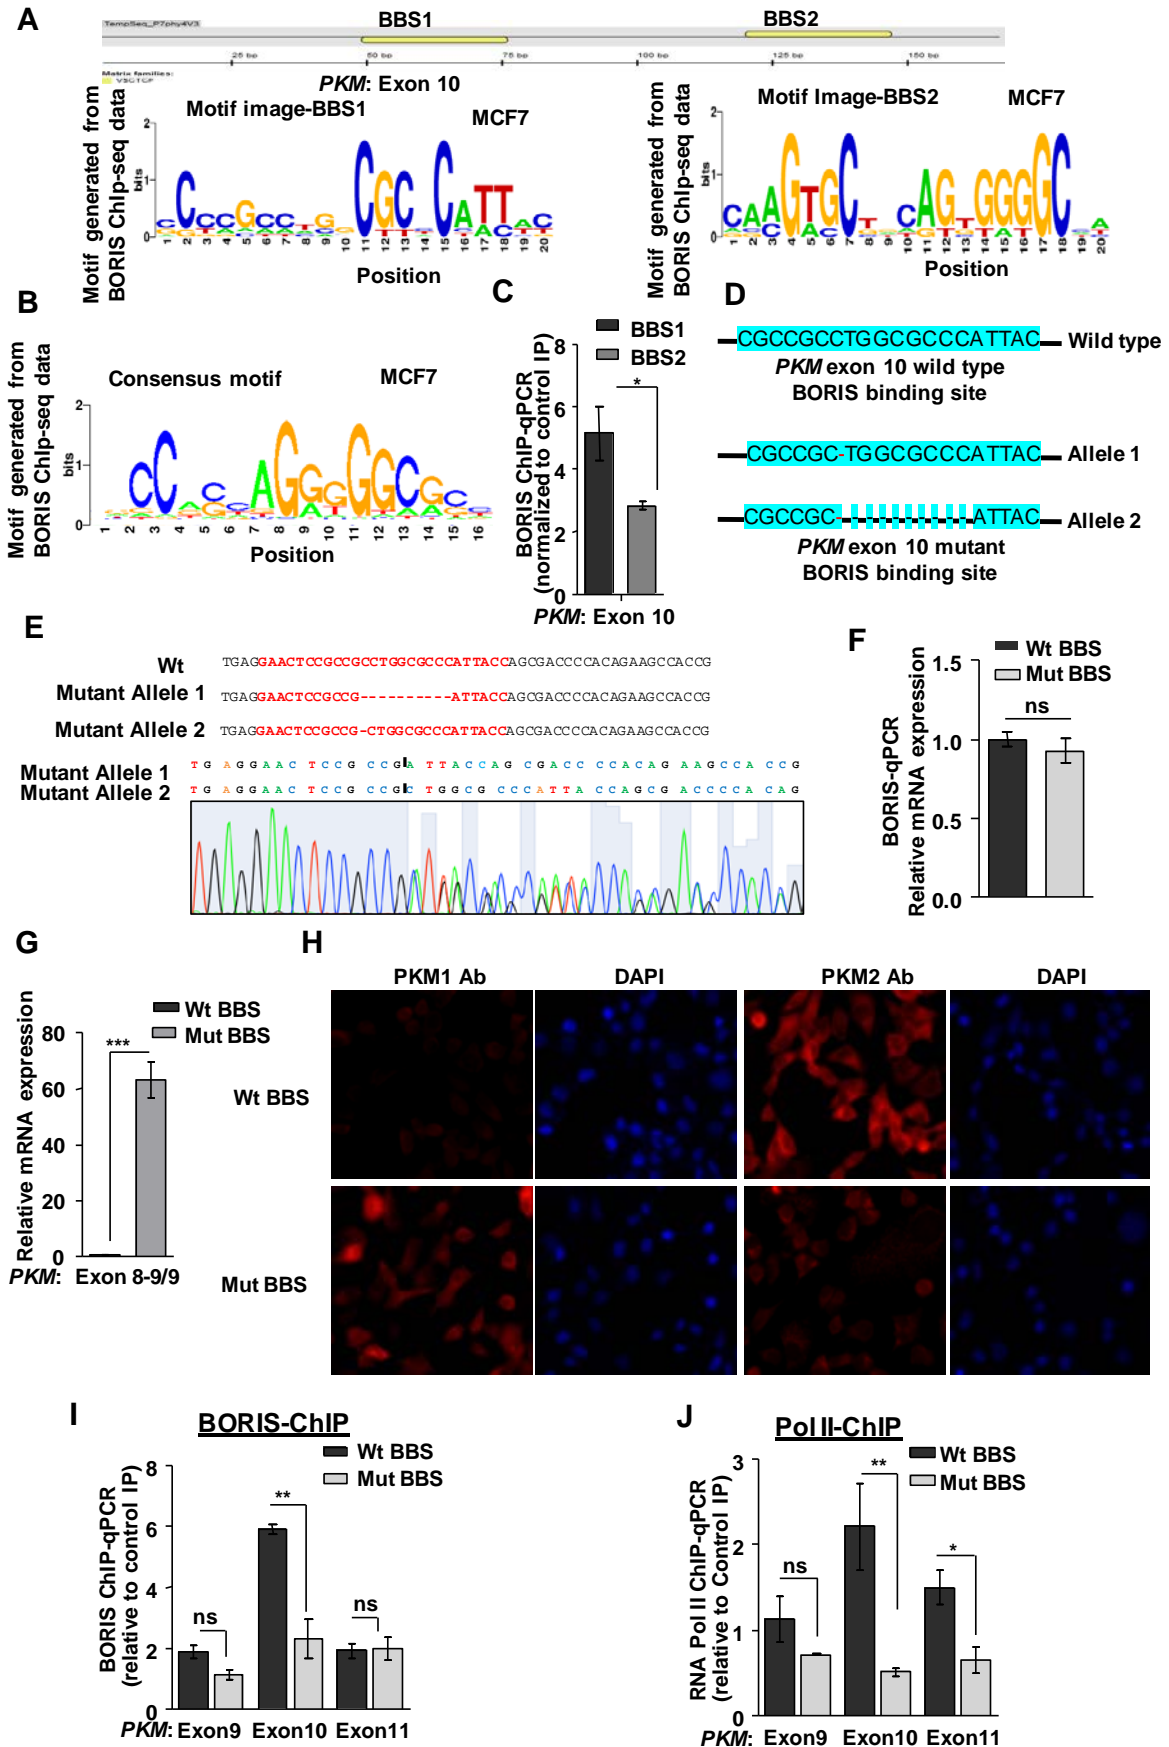

**Fig. S5. CRISPR-Cas9 based mutation of *BORIS* binding site (BBS) and its effect on *PKM* splicing.**

(A) Image showing two BORIS binding sites at the exon 10 region of *PKM* gene using Genomatix software suite. The motif enrichment analysis of BORIS ChIP-seq data shows specific motifs for BBS1 (CGCCGCCTGGCGCCCATAC) and BBS2 (TCAAGTGCTGCAGTGGGGCCATA) at *PKM* exon 10 region. (B) The motif enrichment analysis of BORIS ChIP-seq data showed consensus sequence motif for BORIS with 4506 hits throughout the genome. (C) BORIS chromatin immunoprecipitation (ChIP) in MCF7 cells followed by qPCR relative to input and mouse IgG. (D) Sequence of BORIS mutated clones and wild type MCF7 cells. (E) Top panel shows the BORIS binding site sequence of Wt allele and two mutant alleles of compound heterozygote MCF7 clone. BORIS binding site is marked by bold red letters. Dashed region marks deletion of bases. Bottom panel shows the sequencing histogram of compound heterozygote MCF7 clone consisting of different mutations in two mutant alleles. Region of deletion is marked by dashed line. (F) BORIS mRNA expression level in wild type and BORIS binding site mutated MCF7 cells. (G) *RPS16* normalized qRT-PCR data from wild-type BBS and mutated BBS in *PKM* gene using exon 9, specific junction primer in MCF7 cells. (H) Analysis of PKM1 and PKM2 protein level in wild type BBS and mutated BBS MCF7 cells using immunofluorescence. Representative images were acquired by ApoTome Axio microscope (scale bar 20µm). (I-J) ChIP in wild-type BBS and mutated BBS MCF7 cells, as in Fig. 4C and D using (I) BORIS and (J) RNA Pol II antibody, followed by qRT-PCR relative to input and control IgG. Three independent experiments were conducted. Graphs show mean values  $\pm$  SD. *P* as calculated using two-tailed Student's *t*-test, \* *P* <0.05, \*\* *P* <0.01, \*\*\* *P* <0.001, ns=non-significant.

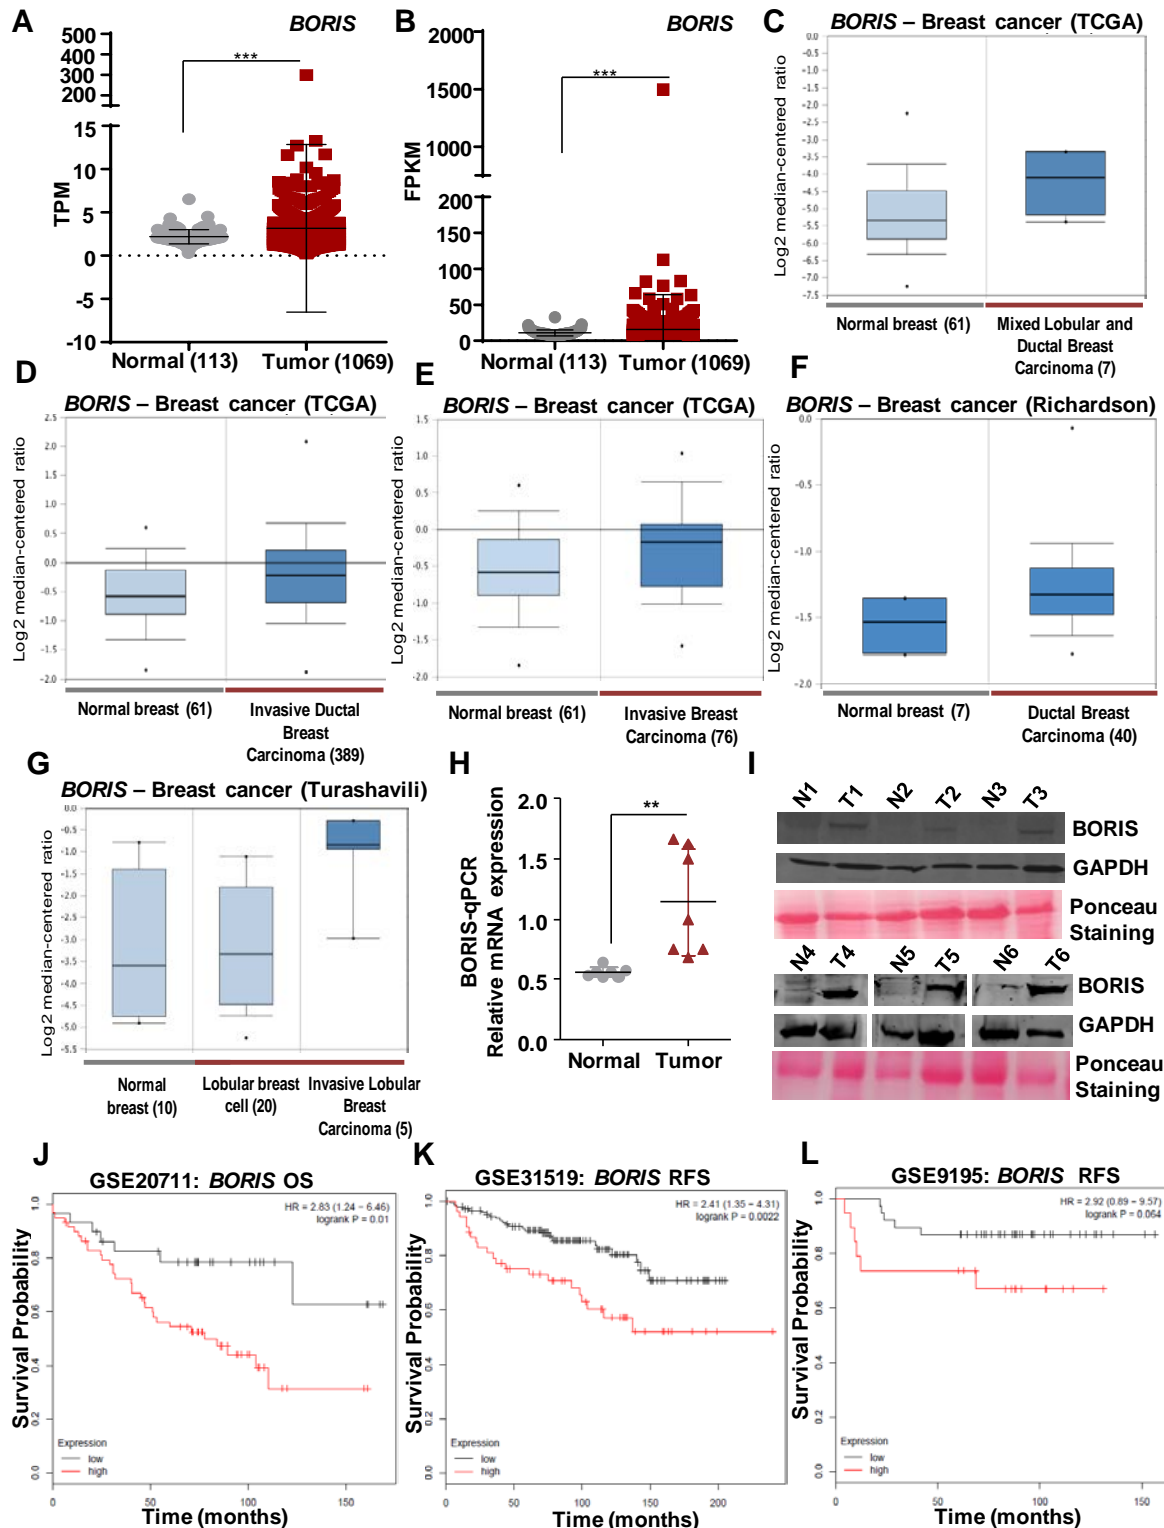

**Fig. S6. *BORIS* overexpression results in poor survival outcome in breast cancer.**

(A-B) *BORIS* expression in breast cancer expression profiles from TCGA (Fold change: 1.69; RNAseqV2 level3 n=1182). (A) *BORIS* expression is plotted in units of Transcript per Million reads (TPM). TPM is one of the relative quantification values to identify the relative expression of transcript levels per cell. (B) *BORIS* expression is plotted in units of Fragments Per Kilobase of transcript per Million mapped reads (FPKM). FPKM is a relative

quantification method of expression of transcript per cell. (C-G) *BORIS* expression in breast cancer expression profiles (C-E), TCGA data from different breast cancer subtypes analyzed in Oncomine, (F) Richardson breast cancer profile (G) Turashvili breast cancer profile, analyzed in Oncomine. (Fold change, and statistical significance are presented in *SI Appendix* Table S5). (H) *BORIS* relative mRNA expression, normalized to the gene *RPS16*. (I) Protein expression of *BORIS* in matched normal and breast tumor tissues. GAPDH and Ponceau staining as a loading control. (Breast cancer patient details are presented in *SI Appendix* Table S6). (J-L) Kaplan-Meier survival analysis of *BORIS* expression in (J) GSE20711 (HR=2.83; p=0.01), (K) GSE31519 (HR=2.41; p=0.0022) (L), GSE9195 (HR=2.92; p=0.064). Red color shows high expression of *BORIS* and black color shows low expression of *BORIS* in all the breast cancer cohorts. (OS=Overall Survival, RFS=Recurrence Free Survival, HR=Hazard ratio).

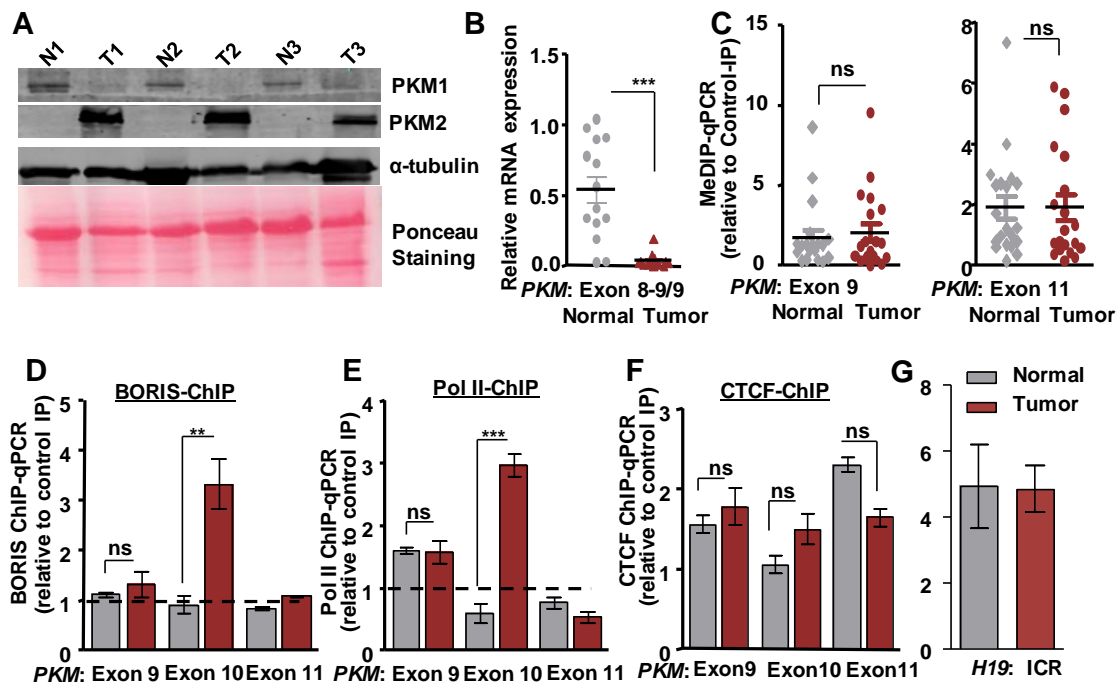

**Fig. S7. Assay of PKM expression, DNA methylation and CTCF binding in breast cancer patients.**

(A) Protein expression of PKM1 and PKM2 in normal and breast tumor tissues by western blot analysis. Tubulin and Ponceau act as a loading control. (B) *RPS16* normalized qRT-PCR data from normal and breast tumor tissue samples using the indicated exon junction-specific primers (n=14) (*SI Appendix* Table S6). (C) MeDIP in normal and breast tumor tissues genomic DNA and qPCR of *PKM* exon 9 and exon 11 region, relative to input and mouse IgG (n=20). (D-E) ChIP in normal and breast tumor tissues, as in Fig. 5C and D, using (D) BORIS and (E) RNA Pol II antibody and qPCR with the indicated exonic primers, relative to input and control IgG (n=3). (F) ChIP in normal and breast tumor tissues using CTCF antibody and qPCR with the indicated exonic primers, relative to input and control IgG (n=3). (G) ChIP in normal and breast tumor tissues using CTCF antibody and qPCR with H19 Imprinting control region (ICR) primer relative to input and control IgG. H19 ICR is the



positive control for the CTCF binding (2). Three independent experiments were conducted. Graphs show mean values  $\pm$  SD. *P* as calculated using two-tailed Student's *t*-test, \* *P* < 0.05, \*\* *P* < 0.01, \*\*\* *P* < 0.001, ns=non-significant.

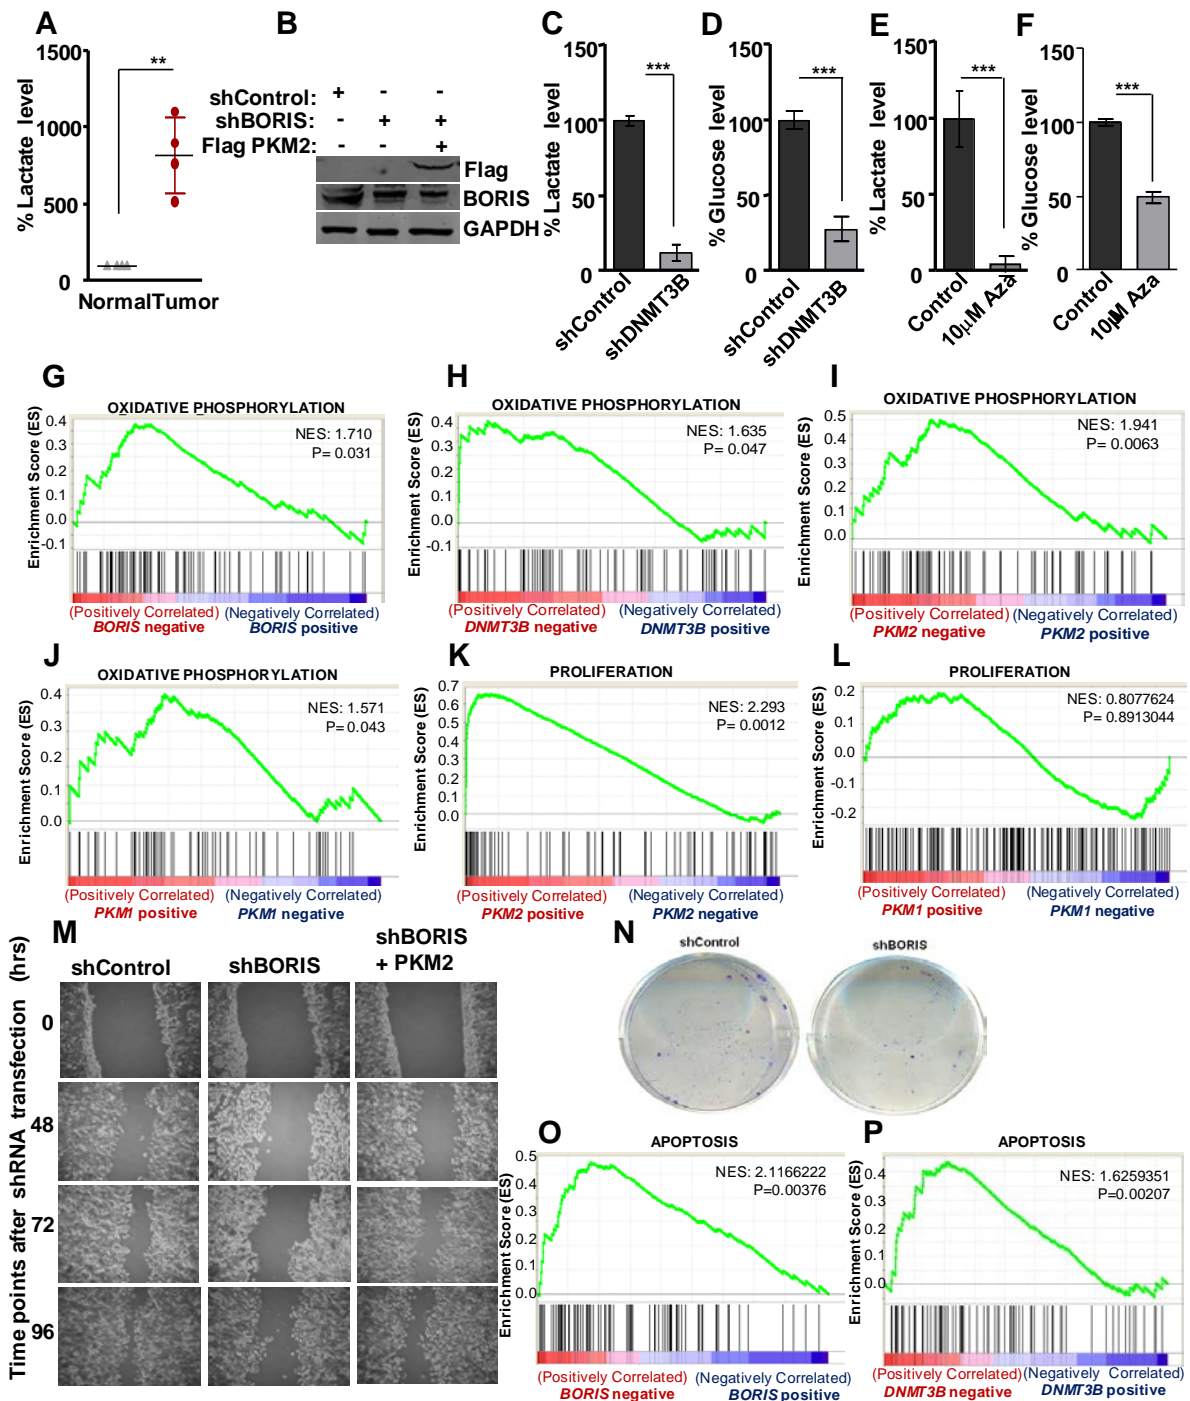

**Fig. S8. Role of BORIS on proliferation and Warburg effect in breast cancer.**

(A) Percentage of lactate production in normal versus tumor tissue (n=4) using lactate assay kit. (B) Protein expression of BORIS and Flag tagged PKM2 in shControl and shBORIS transfected MCF7 cells. GAPDH acts as a loading control. (C-D) Percentage of lactate production and glucose uptake after DNMT3B depletion in MCF7 cells (n=3). (E-F) Percentage of lactate production and glucose uptake after 10 $\mu$ M Aza treatment for 6 days



(n=3). Three independent experiments were conducted. Graphs show mean values  $\pm$  SD. *P* as calculated using two-tailed Student's t-test, \* *P* <0.05, \*\* *P* <0.01, \*\*\* *P* <0.001, ns=non-significant. **(G-J)** GSEA enrichment plot for oxidative phosphorylation (OXPHOS) in the comparison of (G) *BORIS*-positive versus negative (n=1000), (H) *DNMT3B*-positive versus negative (n=1000), (I) *PKM2*-positive versus negative (n=1010), (D) *PKM1*-positive versus negative (n=1010). The plot shows that OXPHOS pathway (n=135 genes) is up-regulated in *BORIS*, *DNMT3B* and *PKM2* negative as compared to *BORIS*, *DNMT3B* and *PKM2* positive breast cancer profiles, whereas is up-regulated in *PKM1* positive as compared to *PKM1* negative breast cancer profiles. Each of the black peaks represents a gene in the OXPHOS pathway. Red and blue colors represent positive and negative Pearson correlation with respective gene expression. **(K-L)** GSEA enrichment plot for Proliferation in the comparison of (K) *PKM2* positive versus negative (n=1069) (L) *PKM1* positive versus negative (n=1069) breast cancer profiles. The plot shows that proliferation pathway (n=178 genes) is significantly up-regulated only in *PKM2* positive as compared to *PKM2* negative breast cancer profiles. Each of the black peaks represents a gene in the proliferation pathway. Red and blue colors represent positive and negative Pearson correlation with respective gene expression (See *SI Appendix* Table S7). **(M)** Representative image of wound healing assay in sh*BORIS* versus shControl transfected MCF7 cells at different time points (n=3). Overexpression of *PKM2* partially rescued the wound area in sh*BORIS* transfected cells. **(N)** Colony forming assay in sh*BORIS* versus shControl transfected MCF7 cells. **(O-P)** GSEA enrichment plot for Apoptosis in the comparison of (O) *BORIS*-positive versus negative (n=1010) (P) *DNMT3B* positive versus negative (n=1010) in breast cancer profiles. The plot shows that Apoptosis pathway (n=88 genes) is overall more active in *BORIS*, *DNMT3B* negative as compared to *BORIS*, *DNMT3B* positive breast cancer profiles. Each of the black peaks represents a gene in the proliferation pathway. Red and blue colors represent positive and negative Pearson correlation with respective gene expression.

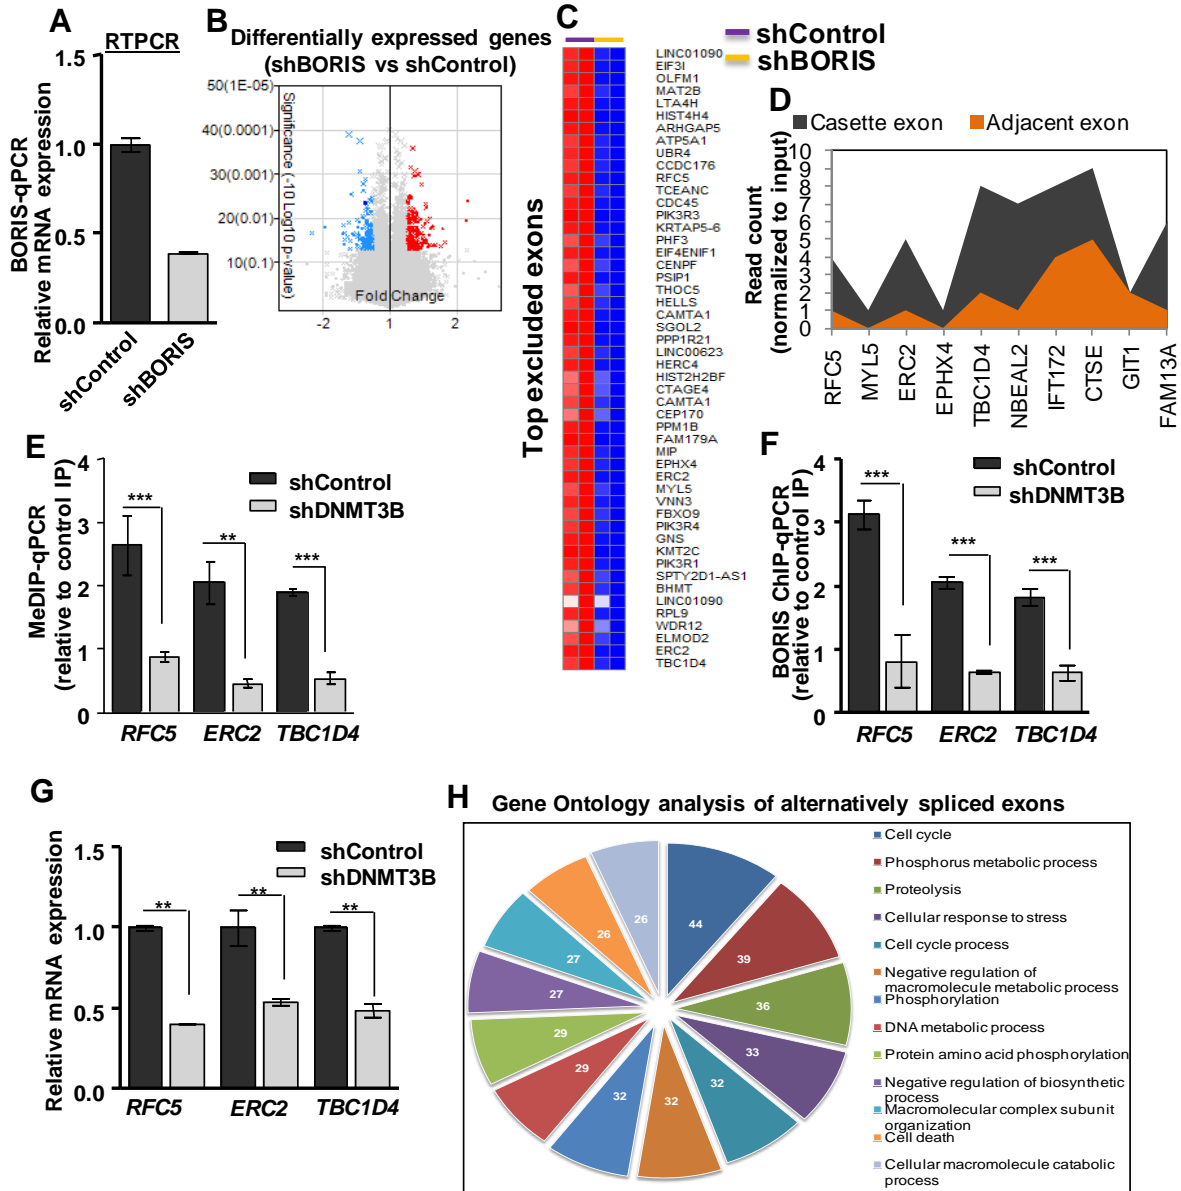

**Fig. S9. Global identification of BORIS mediated alternative splicing in breast cancer cells.**

(A) *RPS16* normalized qRT-PCR in MCF7 cells transfected with shRNA against BORIS and control shRNA to detect *BORIS* mRNA levels. (B) Scatter plot shows the RMA normalized expression levels of differentially expressed genes in shBORIS versus shControl transfected MCF7 cells. Red color dots represent upregulation, blue color dots represent down-regulation and gray color represent unaltered genes (Fold change  $\geq +1.2$  and  $\leq -1.2$ ;  $P < 0.05$ ;  $n=2$ ) (See Dataset S1). (C) Clustering analysis of top 50 spliced events (excluded) and top 30 altered gene events (top 15 up regulated and 15 down regulated) in shBORIS versus shControl transfected MCF7 cells ( $n=2$ ). (D) BORIS ChIP-Seq (GSE70764) analysis to show the enrichment of BORIS at the alternative exons versus adjacent exons of candidate genes. These candidate genes showed exclusion of alternative exon in shBORIS cells as compared to the shControl cells (See Dataset S1). (E) MeDIP qPCR (relative to input and IgG) in MCF7 cells transfected with shControl and shDNMT3B cells to detect methylation level at

alternative exons of genes from shBORIS versus shControl HTA2.0 transcriptome profile. (F) BORIS ChIP-qPCR in MCF7 cells transfected with shControl and shDNMT3B cells to detect BORIS binding at alternative exons of genes from shBORIS versus shControl HTA2.0 transcriptome profile. (G) *RPS16* normalized qRT-PCR from shDNMT3B versus shControl transfected MCF7 cells using indicated exon junction specific primers to detect a change in alternative splicing of genes from shBORIS versus shControl HTA2.0 transcriptome profile (See Dataset S1). (H) Gene Ontology analysis of alternatively spliced genes upon BORIS depletion in MCF7 cells (See *SI Appendix* Table S8). The graph shows the top GO functions regulated in molecular and biological process category. Three independent experiments were conducted. Graphs show mean values  $\pm$  SD. *P* as calculated using two-tailed Student's t-test, \* *P* < 0.05, \*\* *P* < 0.01, \*\*\* *P* < 0.001, ns=non-significant, RMA-robust multi average.

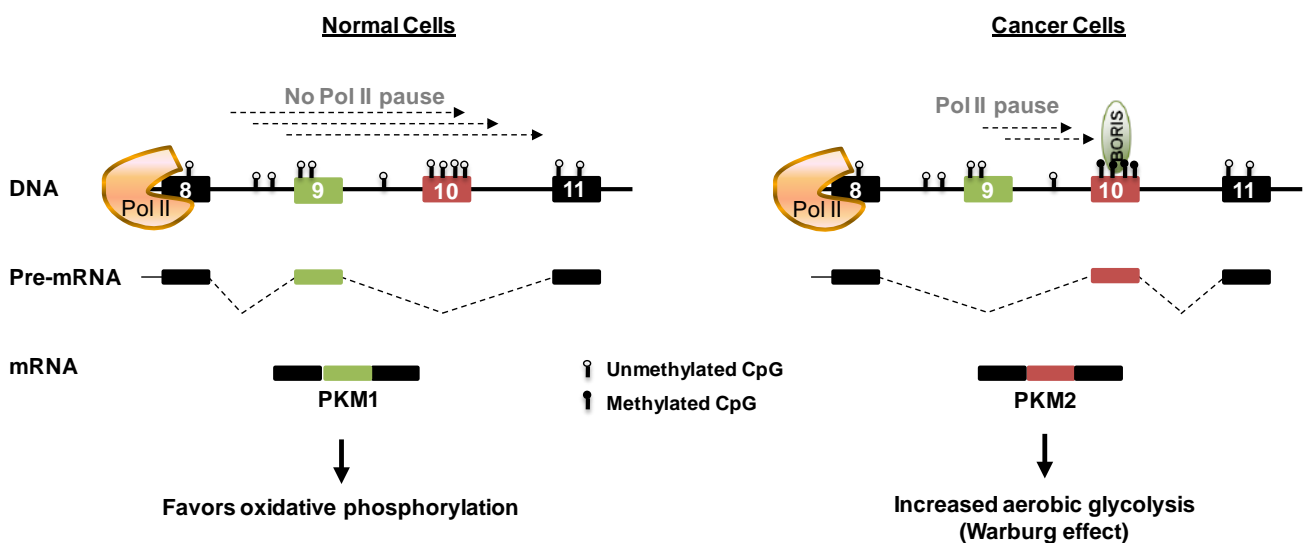

**Fig. S10. Model for BORIS-mediated regulation of *PKM* alternative splicing.**

In cancer cells, BORIS preferentially binds to methylated *PKM* exon 10 DNA as compared to unmethylated exon 10 in normal cells. In the absence of BORIS-mediated Pol II enrichment, exon 10 is excluded from spliced *PKM* transcripts in normal cells. BORIS binds to and promotes local Pol II enrichment at *PKM* exon 10 when the target DNA is methylated on cytosine. The Pol II enrichment thereby provides sufficient time for spliceosome assembly prior to reactivation of elongation. Consequently, exon 10 is included in the spliced *PKM* transcripts in cancer cells. The increased *PKM2* expression in cancer cells promotes Warburg effect and thereby tumorigenesis whereas increased *PKM1* expression in normal cells leads to Oxidative phosphorylation and consequently normal cell growth.

## **SI Appendix Tables**

**Table S1: List of primer sequences utilized for qPCR.**

| <b>S.No.</b> | <b>Primers</b>      | <b>Sequence</b>             |
|--------------|---------------------|-----------------------------|
| 1            | PKM Ex8 Fw          | GCTGGAGAGCATGATCAAGAA       |
| 2            | PKM Ex8 Rev         | CTGTTTCTCCAGACAGCATGA       |
| 3            | PKM E11 Fw          | CCATCATTGCTGTGACCCGGAAT     |
| 4            | PKM E11 Rev         | CATTCATGGCAAAGTTCACCCGGA    |
| 5            | PKM Ex10 Fw         | TAGATTGCCCGTGAGGCAGAGGCT    |
| 6            | PKM E10 Rev         | TGCCAGACTTGGTGAGGACGATTA    |
| 7            | PKM E8-E9 Fw        | ATGCAGCACCTGATAGCTCGTGA     |
| 8            | PKM E9 Fw           | GTTCCACCGCAAGCTGTTTGAAGA    |
| 9            | PKM E9 Rev          | TGCCAGACTCCGTCAGAACTATCA    |
| 10           | PKM E8-10 Fw        | ATGCAGCACCTGATTGCCCGTGA     |
| 11           | PKM E10-11 Fw       | TCACCAAGTCTGGCAGGTCTG       |
| 12           | RPS16 SET5 Fw       | AAACGCGGCAATGGTCTCATCAAG    |
| 13           | RPS16 SET5 Rev      | TGGAGATGGACTGACGGATAGCAT    |
| 14           | beta-ACTIN E3 Fw    | TTCTACAATGAGCTGCGTGTGGCT    |
| 15           | beta-ACTIN E3 Rev   | TCATCTTCTCGCGGTTGGCCTT      |
| 16           | DNMT3A EX7 Fw       | GCCAAGGTCATTGCAGGAA         |
| 17           | DNMT3A EX7 Rev      | CGTACTCTGGCTCGTCATC         |
| 18           | DNMT3B EX5 Fw       | AACAGCATCGGCAGGAA           |
| 19           | DNMT3B EX5 Rev      | GATACTCTGAACTGTCTCCATCTC    |
| 20           | DNMT1 EX4 Fw        | TGCTTACAACCGGGAAGTGAATGG    |
| 21           | DNMT1 EX4 Rev       | TTGGCATCTGCCATTCCCCTCTA     |
| 22           | BORIS Ex1 (211) Fw  | GAAGAGCAGGAGAAGAA           |
| 23           | BORIS Ex1 (211) Rev | CCTTTGTCTTTCTTTGATTT        |
| 24           | CTCF (121) Fw       | ATGTTATATTTGTCATGCTCGGTTTA  |
| 25           | CTCF (121) Rev      | TTTCGGGCTATGACTGTGTC        |
| 26           | RFC5 E5 Fw          | GTGATCTTGATGAAGCAGAC        |
| 27           | RFC5 E5 Rev         | CTCTTCTCAAGGCATTCTGG        |
| 28           | RFC5 E6 Fw          | TAATTGAGAAATTCACAGAAAATACCA |
| 29           | RFC5 E6 Rev         | TTCTCTTCTTCCACGACATGTTC     |
| 30           | RFC5 Cons Fw        | GGTTGAAAAATACCGGCCA         |
| 31           | RFC5 Cons Rev       | TGGTACTCAGAATGTCCTGATGA     |
| 32           | ERC2 E15 Fw         | CAGGAAGCACTACTTGCAGC        |
| 33           | ERC2 E15 Rev        | CTGCTGCTTTAATTGATGTACTAGTCG |
| 34           | ERC2 E16 Fw         | AGAATGAAGTTGATGGCAGACA      |
| 35           | ERC2 E16 Rev        | CCTGTGATTGGAATGTTGCG        |
| 36           | ERC2 Cons Fw        | GAATTGCACCGAAGAAGCC         |
| 37           | ERC2 Cons Rev       | CTTCATTTTCGATGACAGTCTGG     |
| 38           | TBC1D4 E7 Fw        | CAGTGACCAGGAAGAAAATGAAC     |
| 39           | TBC1D4 E7 Rev       | CACGTGTGTCTTCTGCTTGG        |

|    |                    |                                |
|----|--------------------|--------------------------------|
| 40 | TBC1D4 E8 Fw       | AATAGTACAATCCCAGAAAATGCAA      |
| 41 | TBC1D4 E8 Rev      | CCTTGAGAAGATATTTTCCAGGG        |
| 42 | TBC1D4 Cons Fw     | AGAGCCAAGCTGGTGATACAG          |
| 43 | TBC1D4 Cons Rev    | CTGAACTCTTTCAAAGATGTCAGC       |
| 44 | RFC5 E5-6 Jn Rev   | TTCTCAATTACTCTTCTCAAGGCAATT    |
| 45 | ERC2 E15-16 Jn Rev | ATTCTGTTCTGGGTCTGCTGCTTTAA     |
| 46 | TBC1D4 E7-8 Jn Rev | TATTTGAAATAGTAGAAGGGCCTTCC     |
| 47 | H19 ICR Fw         | CCCATCTTGCTGACCTCAC            |
| 48 | H19 ICR Rev        | AGACCTGGGACGTTTCTGTG           |
| 49 | PKM2 OE Fw         | TTTTGCGGCCGCATGTCACCGGAAGCCCAA |
| 50 | PKM2 OE Rev        | TTTTGTCTGACTCACGGCACAGGAACAAC  |

**Table S2: *PKM2* fold change in breast cancer profiles**

| <b>Annotation number</b> | <b><i>PKM2</i> – Breast cancer (Curtis)</b>                | <b>Fold change (compared to normal)</b> | <b><i>P</i> value</b> |
|--------------------------|------------------------------------------------------------|-----------------------------------------|-----------------------|
| 0                        | Normal (61)                                                |                                         |                       |
| 1                        | Benign Breast Neoplasm (3)                                 | 1.695                                   | 0.035                 |
| 2                        | Breast Carcinoma (14)                                      | 1.705                                   | 3.37E-5               |
| 3                        | Breast Phyllodes Tumor (5)                                 | 1.143                                   | 0.117                 |
| 4                        | Ductal Breast Carcinoma insitu (10)                        | 1.755                                   | 9.66E-7               |
| 5                        | Invasive Breast Carcinoma (21)                             | 1.999                                   | 9.72E-6               |
| 6                        | Invasive Ductal Breast Carcinoma (1,556)                   | 2.116                                   | 6.19E-73              |
| 7                        | Invasive Ductal and Invasive Lobular Breast Carcinoma (90) | 1.646                                   | 4.84E-20              |
| 8                        | Invasive Lobular Breast Carcinoma (148)                    | 1.789                                   | 4.03E-39              |
| 9                        | Medullary Breast Carcinoma (32)                            | 2.392                                   | 3.84E-14              |
| 10                       | Mucinous Breast Carcinoma (46)                             | 2.068                                   | 1.83E-22              |
| 11                       | Tubular Breast Carcinoma (67)                              | 1.813                                   | 1.77E-20              |

**Table S3: DNMT's fold change in breast cancer profiles**

| <b>Annotation number</b>             | <b><i>DNMT1</i> – Breast cancer (TCGA)</b>       | <b>Fold change (compared to normal)</b> | <b><i>P</i> value</b> |
|--------------------------------------|--------------------------------------------------|-----------------------------------------|-----------------------|
| 0                                    | Normal (61)                                      |                                         |                       |
| 1                                    | Apocrine Breast Carcinoma (1)                    | ns                                      | Ns                    |
| 2                                    | Breast Large Cell Neuroendocrine Carcinoma (1)   | ns                                      | Ns                    |
| 3                                    | Ductal Breast Carcinoma (1)                      | ns                                      | Ns                    |
| 4                                    | Intraductal Cribriform Breast Adenocarcinoma (3) | 1.398                                   | 0.01                  |
| 5                                    | Invasive Breast Carcinoma (76)                   | 1.886                                   | 2.26E-16              |
| 6                                    | Invasive Cribriform Breast Carcinoma (1)         | ns                                      | Ns                    |
| 7                                    | Invasive Ductal Breast Carcinoma (392)           | 1.93                                    | 7.62E-21              |
| 8                                    | Invasive Ductal and Lobular Carcinoma (3)        | 1.45                                    | 3.43E-10              |
| 9                                    | Invasive Lobular Breast Carcinoma (36)           | 1.63                                    | 1.84E-14              |
| 10                                   | Invasive Papillary Breast Carcinoma (1)          | ns                                      | Ns                    |
| 11                                   | Male Breast Carcinoma (3)                        | 2.285                                   | 6.00E-02              |
| 12                                   | Metaplastic Breast Carcinoma (1)                 | ns                                      | Ns                    |
| 13                                   | Mixed Lobular and Ductal Breast Carcinoma (7)    | 1.555                                   | 2.18E-05              |
| 14                                   | Mucinous Breast Carcinoma (4)                    | 1.967                                   | 0.047                 |
| 15                                   | Papillary Breast Carcinoma (1)                   | ns                                      | Ns                    |
| 16                                   | Pleomorphic Breast Carcinoma (1)                 | ns                                      | Ns                    |
| <b>DNMT3A - Breast cancer (TCGA)</b> |                                                  |                                         |                       |
| <b>Annotation number</b>             | <b><i>DNMT3A</i> - Breast cancer (TCGA)</b>      | <b>Fold change (compared to normal)</b> | <b><i>P</i> value</b> |
| 0                                    | Normal (61)                                      |                                         |                       |
| 1                                    | Apocrine Breast Carcinoma (1)                    | ns                                      | Ns                    |
| 2                                    | Breast Large Cell Neuroendocrine Carcinoma (1)   | ns                                      | Ns                    |
| 3                                    | Ductal Breast Carcinoma (1)                      | ns                                      | Ns                    |
| 4                                    | Intraductal Cribriform Breast Adenocarcinoma (3) | 1.794                                   | 0.054                 |

|                                      |                                                  |    |                                         |                |
|--------------------------------------|--------------------------------------------------|----|-----------------------------------------|----------------|
| 5                                    | Invasive Breast Carcinoma (76)                   |    | 1.923                                   | 1.38E-23       |
| 6                                    | Invasive Cribriform Breast Carcinoma (1)         | ns |                                         | Ns             |
| 7                                    | Invasive Ductal Breast Carcinoma (392)           |    | 2.201                                   | 1.27E-42       |
| 8                                    | Invasive Ductal and Lobular Carcinoma (3)        |    | 1.815                                   | 0.021          |
| 9                                    | Invasive Lobular Breast Carcinoma (36)           |    | 1.587                                   | 7.51E-13       |
| 10                                   | Invasive Papillary Breast Carcinoma (1)          | ns |                                         | Ns             |
| 11                                   | Male Breast Carcinoma (3)                        |    | 1.892                                   | 6.16E-07       |
| 12                                   | Metaplastic Breast Carcinoma (1)                 | ns |                                         | Ns             |
| 13                                   | Mixed Lobular and Ductal Breast Carcinoma (7)    |    | 1.933                                   | 4.66E-04       |
| 14                                   | Mucinous Breast Carcinoma (4)                    |    | 3.282                                   | 0.002          |
| 15                                   | Papillary Breast Carcinoma (1)                   | ns |                                         | Ns             |
| 16                                   | Pleomorphic Breast Carcinoma (1)                 | ns |                                         | Ns             |
| <b>DNMT3B – Breast cancer (TCGA)</b> |                                                  |    |                                         |                |
| <b>Annotation number</b>             |                                                  |    | <b>Fold change (compared to normal)</b> | <b>P value</b> |
| 0                                    | Normal (61)                                      |    |                                         |                |
| 1                                    | Apocrine Breast Carcinoma (1)                    | ns |                                         | Ns             |
| 2                                    | Breast Large Cell Neuroendocrine Carcinoma (1)   | ns |                                         | Ns             |
| 3                                    | Ductal Breast Carcinoma (1)                      | ns |                                         | Ns             |
| 4                                    | Intraductal Cribriform Breast Adenocarcinoma (3) |    | 1.248                                   | 0.304          |
| 5                                    | Invasive Breast Carcinoma (76)                   |    | 1.75                                    | 1.15E-09       |
| 6                                    | Invasive Cribriform Breast Carcinoma (1)         | ns |                                         | Ns             |
| 7                                    | Invasive Ductal Breast Carcinoma (392)           |    | 2.259                                   | 3.43E-30       |
| 8                                    | Invasive Ductal and Lobular Carcinoma (3)        |    | 1.373                                   | 0.046          |
| 9                                    | Invasive Lobular Breast Carcinoma (36)           |    | 1.413                                   | 4.45E-04       |
| 10                                   | Invasive Papillary Breast Carcinoma (1)          | ns |                                         | Ns             |
| 11                                   | Male Breast Carcinoma (3)                        |    | 1.314                                   | 2.17E-01       |

|    |                                               |       |          |
|----|-----------------------------------------------|-------|----------|
| 12 | Metaplastic Breast Carcinoma (1)              | ns    | Ns       |
| 13 | Mixed Lobular and Ductal Breast Carcinoma (7) | 1.647 | 3.40E-02 |
| 14 | Mucinous Breast Carcinoma (4)                 | 1.447 | 0.264    |
| 15 | Papillary Breast Carcinoma (1)                | ns    | Ns       |
| 16 | Pleomorphic Breast Carcinoma (1)              | ns    | Ns       |

**Table S4:** List of splicing factors binding at exon 10 region of *PKM* gene.

| Sequence Position | Linked SR protein   | cDNA Position | Enhancer motif score |
|-------------------|---------------------|---------------|----------------------|
| 3                 | SC35                | TGCCCGTG      | 81.81                |
| 3                 | SF2/ASF (IgM-BRCA1) | TGCCCGT       | 71.23                |
| 9                 | SRp55               | TGAGGC        | 77.19                |
| 14                | SF2/ASF (IgM-BRCA1) | CAGAGGC       | 82.31                |
| 14                | SF2/ASF             | CAGAGGC       | 82.18                |
| 18                | SC35                | GGCTGCCA      | 86.42                |
| 20                | SF2/ASF (IgM-BRCA1) | CTGCCAT       | 72.92                |
| 30                | SRp40               | CCACTTG       | 84.25                |
| 43                | SRp40               | TTTGAGG       | 81.56                |
| 45                | SRp55               | TGAGGA        | 74.82                |
| 49                | SC35                | GAACTCCG      | 82.97                |
| 54                | SF2/ASF (IgM-BRCA1) | CCGCCGC       | 75.54                |
| 55                | SF2/ASF (IgM-BRCA1) | CGCCGCC       | 71.61                |
| 57                | SF2/ASF (IgM-BRCA1) | CCGCCTG       | 71.23                |
| 58                | SF2/ASF (IgM-BRCA1) | CGCCTGG       | 79.61                |
| 63                | SC35                | GGCGCCA       | 76.77                |
| 65                | SF2/ASF (IgM-BRCA1) | CGCCCAT       | 81.38                |
| 65                | SF2/ASF             | CGCCCAT       | 74.61                |
| 71                | SRp40               | TTACCAG       | 84.31                |
| 79                | SC35                | GACCCAC       | 77.63                |
| 82                | SF2/ASF (IgM-BRCA1) | CCCACAG       | 75.54                |
| 83                | SRp40               | CCACAGA       | 83.59                |
| 84                | SRp55               | CACAGA        | 75.4                 |
| 84                | SF2/ASF (IgM-BRCA1) | CACAGAA       | 82.46                |
| 84                | SF2/ASF             | CACAGAA       | 81.48                |
| 85                | SRp40               | ACAGAAG       | 80                   |
| 90                | SC35                | AGCCACCG      | 82.42                |
| 92                | SRp40               | CCACCGC       | 82.34                |
| 93                | SC35                | CACCGCCG      | 75.91                |
| 95                | SF2/ASF (IgM-BRCA1) | CCGCCGT       | 84.69                |
| 95                | SF2/ASF             | CCGCCGT       | 80.72                |
| 96                | SF2/ASF (IgM-BRCA1) | CGCCGTG       | 80                   |
| 98                | SF2/ASF (IgM-BRCA1) | CCGTGGG       | 71.92                |



|     |                     |          |       |
|-----|---------------------|----------|-------|
| 104 | SC35                | GTGCCGTG | 76.21 |
| 104 | SF2/ASF             | GTGCCGT  | 75.01 |
| 107 | SF2/ASF (IgM-BRCA1) | CCGTGGA  | 75.23 |
| 114 | SC35                | GGCCTCCT | 77.5  |
| 120 | SRp40               | CTTCAAG  | 86.29 |
| 127 | SRp55               | TGCTGC   | 76.16 |
| 129 | SF2/ASF (IgM-BRCA1) | CTGCAGT  | 71.92 |
| 132 | SF2/ASF (IgM-BRCA1) | CAGTGGG  | 77.15 |
| 132 | SF2/ASF             | CAGTGGG  | 76.47 |
| 137 | SC35                | GGGCCATA | 75.23 |
| 138 | SC35                | GGCCATAA | 77.5  |
| 142 | SRp40               | ATAATCG  | 79.1  |
| 150 | SRp40               | CCTCACC  | 84.61 |
| 151 | SF2/ASF (IgM-BRCA1) | CTCACCA  | 81.77 |
| 151 | SF2/ASF             | CTCACCA  | 78.51 |
| 158 | SRp40               | AGTCTGG  | 81.02 |
| 159 | SC35                | GTCTGGCA | 76.83 |

**Table S5: *BORIS* fold change in breast cancer profiles**

| <b><i>BORIS</i> - Breast cancer (TCGA)</b>       | <b>Fold change (compared to normal)</b> | <b><i>P</i> value</b> |
|--------------------------------------------------|-----------------------------------------|-----------------------|
| Normal (61)                                      |                                         |                       |
| Invasive Ductal Breast Carcinoma (389)           | 1.271                                   | 2.85E-05              |
| <b><i>BORIS</i> - Breast cancer (TCGA)</b>       |                                         |                       |
| <b><i>BORIS</i> - Breast cancer (TCGA)</b>       | <b>Fold change (compared to normal)</b> | <b><i>P</i> value</b> |
| Normal (61)                                      |                                         |                       |
| Invasive Breast Carcinoma (76)                   | 1.223                                   | 0.003                 |
| <b><i>BORIS</i> - Breast cancer (TCGA)</b>       |                                         |                       |
| <b><i>BORIS</i> - Breast cancer (TCGA)</b>       | <b>Fold change (compared to normal)</b> | <b><i>P</i> value</b> |
| Normal (61)                                      |                                         |                       |
| Mixed lobular and Ductal Breast Carcinoma (7)    | 1.699                                   | 0.022                 |
| <b><i>BORIS</i> - Breast cancer (Richardson)</b> |                                         |                       |
| <b><i>BORIS</i> - Breast cancer (Richardson)</b> | <b>Fold change (compared to normal)</b> | <b><i>P</i> value</b> |
| Normal (7)                                       |                                         |                       |
| Ductal Breast Carcinoma (40)                     | 1.233                                   | 0.002                 |

**Table S6: Clinical characteristics of patients.**

| S.No. | Patient No. | Histopathology                               |
|-------|-------------|----------------------------------------------|
| 1     | Patient 1   | Duct Carcinoma                               |
| 2     | Patient 2   | Infiltrating Duct Carcinoma                  |
| 3     | Patient 3   | Duct Carcinoma                               |
| 4     | Patient 4   | Grade III infiltrating duct carcinoma        |
| 5     | Patient 5   | Grade III invasive Duct Carcinoma            |
| 6     | Patient 6   | Invasive Duct Carcinoma                      |
| 7     | Patient 7   | Invasive Duct Carcinoma                      |
| 8     | Patient 8   | Grade II Duct Carcinoma                      |
| 9     | Patient 9   | Invasive Lobular Carcinoma                   |
| 10    | Patient 10  | Invasive Duct Carcinoma                      |
| 11    | Patient 11  | Infiltrating Duct Carcinoma                  |
| 12    | Patient 12  | Duct Carcinoma Breast Nuclear Grade III      |
| 13    | Patient 13  | Infiltrating Duct Carcinoma                  |
| 14    | Patient 14  | Invasive Duct Carcinoma                      |
| 15    | Patient 15  | Infiltrating Duct Carcinoma                  |
| 16    | Patient 16  | Infiltrating Duct Carcinoma                  |
| 17    | Patient 17  | Invasive Duct Carcinoma                      |
| 18    | Patient 18  | Infiltrating Duct Carcinoma Grade III T4N0   |
| 19    | Patient 19  | Invasive Duct Carcinoma Grade III            |
| 20    | Patient 20  | Infiltrating Duct Carcinoma T2N0Mx           |
| 21    | Patient 21  | Infiltrating Duct Carcinoma Grade II         |
| 22    | Patient 22  | Infiltrating Duct Carcinoma T2N0M0           |
| 23    | Patient 23  | Infiltrating Duct Carcinoma Grade III T3N0Mx |
| 24    | Patient 24  | Infiltrating Duct Carcinoma Grade II         |
| 25    | Patient 25  | Infiltrating Duct Carcinoma Grade II T3N0Mx  |

**Table S7: Genesets used for GSEA analysis**

|                                 |                |                                                                                                                                                                       |
|---------------------------------|----------------|-----------------------------------------------------------------------------------------------------------------------------------------------------------------------|
| Genesets used for GSEA analysis |                |                                                                                                                                                                       |
| KEGG_OXIDATIVE_PHOSPHORYLATION  | KEGG_APOPTOSIS | CHIANG_LIVER_CANCER_SUBCLASS_PROLIFERATION_UP                                                                                                                         |
| > Oxidative phosphorylation     | > Apoptosis    | > Top 200 marker genes up-regulated in the 'proliferation' subclass of hepatocellular carcinoma (HCC); characterized by increased proliferation, high levels of serum |

|          |        |                                                |
|----------|--------|------------------------------------------------|
|          |        | AFP [GeneID=174], and chromosomal instability. |
| ATP12A   | AIFM1  | ABCC1                                          |
| ATP4A    | AKT1   | AFP                                            |
| ATP4B    | AKT2   | ANLN                                           |
| ATP5A1   | AKT3   | ARHGAP18                                       |
| ATP5B    | APAF1  | ARID3A                                         |
| ATP5C1   | ATM    | ASPM                                           |
| ATP5D    | BAD    | ASRGL1                                         |
| ATP5E    | BAX    | ATP1A1                                         |
| ATP5F1   | BCL2   | AURKA                                          |
| ATP5G1   | BCL2L1 | AURKB                                          |
| ATP5G1P5 | BID    | B3GNT5                                         |
| ATP5G2   | BIRC2  | B4GALT5                                        |
| ATP5G3   | BIRC3  | BACE2                                          |
| ATP5H    | CAPN1  | BARD1                                          |
| ATP5I    | CAPN2  | BCAT1                                          |
| ATP5J    | CASP10 | BIRC5                                          |
| ATP5J2   | CASP3  | BUB1B                                          |
| ATP5L    | CASP6  | C11orf93                                       |
| ATP5O    | CASP7  | C4orf7                                         |
| ATP6     | CASP8  | CCDC109B                                       |
| ATP6AP1  | CASP9  | CCNA2                                          |
| ATP6V0A1 | CFLAR  | CCNB1                                          |
| ATP6V0A2 | CHP    | CCNB2                                          |
| ATP6V0A4 | CHP2   | CCNE1                                          |
| ATP6V0B  | CHUK   | CD24                                           |
| ATP6V0C  | CSF2RB | CDC20                                          |
| ATP6V0D1 | CYCS   | CDC6                                           |
| ATP6V0D2 | DFFA   | CDC7                                           |
| ATP6V0E1 | DFFB   | CDCA5                                          |
| ATP6V0E2 | ENDOD1 | CDCA7                                          |
| ATP6V1A  | ENDOG  | CDCA7L                                         |
| ATP6V1B1 | EXO1   | CDK1                                           |
| ATP6V1B2 | FADD   | CDKN3                                          |
| ATP6V1C1 | FAS    | CENPE                                          |
| ATP6V1C2 | FASLG  | CENPF                                          |
| ATP6V1D  | IKBKB  | CEP55                                          |
| ATP6V1E1 | IKBKG  | CHST11                                         |
| ATP6V1E2 | IL1A   | CKAP2L                                         |
| ATP6V1F  | IL1B   | CKAP4                                          |
| ATP6V1G1 | IL1R1  | CMTM3                                          |
| ATP6V1G2 | IL1RAP | CSDA                                           |

|              |           |          |
|--------------|-----------|----------|
| ATP6V1G3     | IL3       | CTBP2    |
| ATP6V1H      | IL3RA     | CYBA     |
| ATP8         | IRAK1     | DBN1     |
| COX1         | IRAK2     | DDR1     |
| COX10        | IRAK3     | DEPDC1   |
| COX11        | IRAK4     | DEPDC1B  |
| COX15        | LOC651610 | DLGAP5   |
| COX17        | MAP3K14   | DSCC1    |
| COX2         | MYD88     | DTL      |
| COX3         | NFKB1     | DUSP9    |
| COX4I1       | NFKBIA    | E2F8     |
| COX4I2       | NGF       | ECT2     |
| COX5A        | NTRK1     | ELF4     |
| COX5B        | PIK3CA    | ELOVL7   |
| COX6A1       | PIK3CB    | ETV4     |
| COX6A2       | PIK3CD    | EZH2     |
| COX6B1       | PIK3CG    | FAM118A  |
| COX6B2       | PIK3R1    | FAM164A  |
| COX6C        | PIK3R2    | FANCI    |
| COX6CP3      | PIK3R3    | FBXO5    |
| COX7A1       | PIK3R5    | FEN1     |
| COX7A2       | PPP3CA    | FHOD3    |
| COX7A2L      | PPP3CB    | FLVCR1   |
| COX7B        | PPP3CC    | FMNL2    |
| COX7B2       | PPP3R1    | FOXO1    |
| COX7C        | PPP3R2    | FUNDC1   |
| COX8A        | PRKACA    | G6PD     |
| COX8C        | PRKACB    | GALNT7   |
| CYC1         | PRKACG    | GLIS2    |
| CYTB         | PRKAR1A   | GPD1L    |
| LHPP         | PRKAR1B   | H19      |
| LOC100133737 | PRKAR2A   | HDAC2    |
| LOC642502    | PRKAR2B   | HELLS    |
| LOC644310    | PRKX      | HIST1H4C |
| LOC727947    | RELA      | HJURP    |
| ND1          | RIPK1     | HK2      |
| ND2          | TNF       | HMGB2    |
| ND3          | TNFRSF10A | HN1      |
| ND4          | TNFRSF10B | IGF2BP3  |
| ND4L         | TNFRSF10C | KIF11    |
| ND5          | TNFRSF10D | KIF14    |
| ND6          | TNFRSF1A  | KIF18B   |

|          |         |          |
|----------|---------|----------|
| NDUFA1   | TNFSF10 | KIF20A   |
| NDUFA10  | TP53    | KIF23    |
| NDUFA11  | TRADD   | KIF2C    |
| NDUFA2   | TRAF2   | KIF4A    |
| NDUFA3   | XIAP    | LAMB1    |
| NDUFA4   |         | LDLRAD3  |
| NDUFA4L2 |         | LEPREL4  |
| NDUFA5   |         | LHFPL2   |
| NDUFA6   |         | LMNB1    |
| NDUFA7   |         | LRRC1    |
| NDUFA8   |         | MAD2L1   |
| NDUFA9   |         | MAPK13   |
| NDUFAB1  |         | 03-Mar   |
| NDUFB1   |         | MARCKS   |
| NDUFB10  |         | MARCKSL1 |
| NDUFB2   |         | MCM2     |
| NDUFB3   |         | MECOM    |
| NDUFB4   |         | MEP1A    |
| NDUFB5   |         | MKI67    |
| NDUFB6   |         | MMD      |
| NDUFB7   |         | MMP12    |
| NDUFB8   |         | MMP9     |
| NDUFB9   |         | MTMR2    |
| NDUFC1   |         | NCAPG    |
| NDUFC2   |         | NCEH1    |
| NDUFS1   |         | NCK2     |
| NDUFS2   |         | NDC80    |
| NDUFS3   |         | NEK2     |
| NDUFS4   |         | NT5DC2   |
| NDUFS5   |         | NUF2     |
| NDUFS6   |         | NUSAP1   |
| NDUFS7   |         | OIP5     |
| NDUFS8   |         | ORC6     |
| NDUFV1   |         | PAFAH1B3 |
| NDUFV2   |         | PAG1     |
| NDUFV3   |         | PAPLN    |
| PPA1     |         | PBK      |
| PPA2     |         | PDE9A    |
| SDHA     |         | PELI1    |
| SDHB     |         | PIGAP1   |
| SDHC     |         | PKDCC    |
| SDHD     |         | PKM2     |

|         |  |          |
|---------|--|----------|
| TCIRG1  |  | PLBD1    |
| UQCR10  |  | PLP2     |
| UQCR11  |  | PM20D2   |
| UQCRB   |  | PNMA1    |
| UQCRC1  |  | PRC1     |
| UQCRC2  |  | PRKCD    |
| UQCRFS1 |  | PRR11    |
| UQCRH   |  | PTP4A3   |
| UQCRHL  |  | PTTG1    |
| UQCRQ   |  | RACGAP1  |
|         |  | RAD51AP1 |
|         |  | RFC4     |
|         |  | RMI2     |
|         |  | S100P    |
|         |  | SALL2    |
|         |  | SALL4    |
|         |  | SASS6    |
|         |  | SEL1L3   |
|         |  | SELM     |
|         |  | SGOL2    |
|         |  | SHCBP1   |
|         |  | SKA1     |
|         |  | SLAMF8   |
|         |  | SLC12A3  |
|         |  | SLC16A3  |
|         |  | SLC1A5   |
|         |  | SLC38A1  |
|         |  | SLC39A10 |
|         |  | SLC7A7   |
|         |  | SMC4     |
|         |  | SOX4     |
|         |  | SOX9     |
|         |  | SPHK1    |
|         |  | SYNJ2    |
|         |  | TMED3    |
|         |  | TMEM51   |
|         |  | TMEM65   |
|         |  | TNFRSF21 |
|         |  | TOP2A    |
|         |  | TPX2     |
|         |  | TRIP13   |
|         |  | TRNP1    |
|         |  | TTF2     |
|         |  | TTK      |

|  |  |           |
|--|--|-----------|
|  |  | TUBA4A    |
|  |  | UBE2C     |
|  |  | UGCG      |
|  |  | VEGFB     |
|  |  | WASF1     |
|  |  | WSB1      |
|  |  | ZNF532    |
|  |  | ZNFX1-AS1 |
|  |  | ZWINT     |

**Table S8: Gene ontology analysis of alternatively spliced genes upon *BORIS* depletion**

| <b>Gene Ontology analysis of alternative spliced genes</b> |                                                            |              |          |                |
|------------------------------------------------------------|------------------------------------------------------------|--------------|----------|----------------|
| <b>Category</b>                                            | <b>Term</b>                                                | <b>Count</b> | <b>%</b> | <b>P value</b> |
| GOTERM_BP_FAT                                              | cell cycle                                                 | 44           | 9.4      | 9.80E-07       |
| GOTERM_BP_FAT                                              | phosphorus metabolic process                               | 39           | 8.3      | 4.90E-03       |
| GOTERM_BP_FAT                                              | proteolysis                                                | 36           | 7.7      | 5.70E-02       |
| GOTERM_BP_FAT                                              | cellular response to stress                                | 33           | 7        | 1.80E-05       |
| GOTERM_BP_FAT                                              | cell cycle process                                         | 32           | 6.8      | 4.30E-05       |
| GOTERM_BP_FAT                                              | negative regulation of macromolecule metabolic process     | 32           | 6.8      | 3.50E-03       |
| GOTERM_BP_FAT                                              | phosphorylation                                            | 32           | 6.8      | 1.20E-02       |
| GOTERM_BP_FAT                                              | DNA metabolic process                                      | 29           | 6.2      | 8.80E-05       |
| GOTERM_BP_FAT                                              | protein amino acid phosphorylation                         | 29           | 6.2      | 5.80E-03       |
| GOTERM_BP_FAT                                              | negative regulation of biosynthetic process                | 27           | 5.7      | 2.90E-03       |
| GOTERM_BP_FAT                                              | macromolecular complex subunit organization                | 27           | 5.7      | 3.70E-02       |
| GOTERM_BP_FAT                                              | cell death                                                 | 26           | 5.5      | 6.60E-02       |
| GOTERM_BP_FAT                                              | death                                                      | 26           | 5.5      | 6.90E-02       |
| GOTERM_BP_FAT                                              | cellular macromolecule catabolic process                   | 26           | 5.5      | 7.20E-02       |
| GOTERM_BP_FAT                                              | response to DNA damage stimulus                            | 23           | 4.9      | 2.10E-04       |
| GOTERM_BP_FAT                                              | cell cycle phase                                           | 23           | 4.9      | 8.60E-04       |
| GOTERM_BP_FAT                                              | chromosome organization                                    | 23           | 4.9      | 6.00E-03       |
| GOTERM_BP_FAT                                              | negative regulation of nitrogen compound metabolic process | 22           | 4.7      | 2.30E-02       |
| GOTERM_BP_FAT                                              | proteolysis involved in cellular protein catabolic process | 22           | 4.7      | 8.30E-02       |
| GOTERM_BP_FAT                                              | apoptosis                                                  | 22           | 4.7      | 8.50E-02       |
| GOTERM_BP_FAT                                              | cellular protein catabolic process                         | 22           | 4.7      | 8.60E-02       |
| GOTERM_BP_FAT                                              | programmed cell death                                      | 22           | 4.7      | 9.50E-02       |

|               |                                                                                              |    |     |          |
|---------------|----------------------------------------------------------------------------------------------|----|-----|----------|
| GOTERM_BP_FAT | negative regulation of gene expression                                                       | 21 | 4.5 | 3.20E-02 |
| GOTERM_BP_FAT | negative regulation of nucleobase, nucleoside, nucleotide and nucleic acid metabolic process | 21 | 4.5 | 3.60E-02 |
| GOTERM_BP_FAT | modification-dependent macromolecule catabolic process                                       | 21 | 4.5 | 9.20E-02 |
| GOTERM_BP_FAT | modification-dependent protein catabolic process                                             | 21 | 4.5 | 9.20E-02 |
| GOTERM_BP_FAT | M phase                                                                                      | 20 | 4.3 | 7.30E-04 |
| GOTERM_BP_FAT | cell projection organization                                                                 | 20 | 4.3 | 2.60E-03 |
| GOTERM_BP_FAT | regulation of phosphate metabolic process                                                    | 20 | 4.3 | 3.90E-02 |
| GOTERM_BP_FAT | regulation of phosphorus metabolic process                                                   | 20 | 4.3 | 3.90E-02 |
| GOTERM_BP_FAT | mitotic cell cycle                                                                           | 19 | 4   | 6.20E-03 |
| GOTERM_BP_FAT | cellular component morphogenesis                                                             | 19 | 4   | 1.20E-02 |
| GOTERM_BP_FAT | cytoskeleton organization                                                                    | 19 | 4   | 2.90E-02 |
| GOTERM_BP_FAT | cell proliferation                                                                           | 19 | 4   | 2.90E-02 |
| GOTERM_BP_FAT | protein complex biogenesis                                                                   | 19 | 4   | 9.00E-02 |
| GOTERM_BP_FAT | protein complex assembly                                                                     | 19 | 4   | 9.00E-02 |
| GOTERM_BP_FAT | DNA repair                                                                                   | 18 | 3.8 | 9.10E-04 |
| GOTERM_BP_FAT | cell morphogenesis                                                                           | 18 | 3.8 | 9.20E-03 |
| GOTERM_BP_FAT | negative regulation of transcription                                                         | 18 | 3.8 | 7.50E-02 |
| GOTERM_BP_FAT | regulation of phosphorylation                                                                | 18 | 3.8 | 8.30E-02 |
| GOTERM_BP_FAT | cell division                                                                                | 17 | 3.6 | 3.50E-03 |
| GOTERM_BP_FAT | response to abiotic stimulus                                                                 | 17 | 3.6 | 2.50E-02 |
| GOTERM_BP_FAT | regulation of cell cycle                                                                     | 16 | 3.4 | 2.20E-02 |
| GOTERM_BP_FAT | DNA replication                                                                              | 15 | 3.2 | 3.40E-04 |
| GOTERM_BP_FAT | skeletal system development                                                                  | 15 | 3.2 | 3.20E-02 |
| GOTERM_BP_FAT | regulation of protein kinase activity                                                        | 15 | 3.2 | 5.60E-02 |
| GOTERM_BP_FAT | regulation of kinase activity                                                                | 15 | 3.2 | 6.90E-02 |
| GOTERM_BP_FAT | protein kinase cascade                                                                       | 15 | 3.2 | 8.80E-02 |
| GOTERM_BP_FAT | regulation of transferase activity                                                           | 15 | 3.2 | 9.20E-02 |
| GOTERM_BP_FAT | positive regulation of developmental process                                                 | 14 | 3   | 2.50E-02 |
| GOTERM_BP_FAT | neuron development                                                                           | 14 | 3   | 9.10E-02 |
| GOTERM_BP_FAT | regulation of locomotion                                                                     | 13 | 2.8 | 3.60E-03 |
| GOTERM_BP_FAT | mitosis                                                                                      | 13 | 2.8 | 1.00E-02 |
| GOTERM_BP_FAT | nuclear division                                                                             | 13 | 2.8 | 1.00E-02 |
| GOTERM_BP_FAT | M phase of mitotic cell cycle                                                                | 13 | 2.8 | 1.20E-02 |
| GOTERM_BP_FAT | organelle fission                                                                            | 13 | 2.8 | 1.40E-02 |



|               |                                                           |    |     |          |
|---------------|-----------------------------------------------------------|----|-----|----------|
| GOTERM_BP_FAT | cell projection morphogenesis                             | 13 | 2.8 | 2.20E-02 |
| GOTERM_BP_FAT | cell part morphogenesis                                   | 13 | 2.8 | 3.00E-02 |
| GOTERM_BP_FAT | MAPKKK cascade                                            | 12 | 2.6 | 7.20E-03 |
| GOTERM_BP_FAT | regulation of cell motion                                 | 12 | 2.6 | 1.00E-02 |
| GOTERM_BP_FAT | neuron projection development                             | 12 | 2.6 | 6.10E-02 |
| GOTERM_BP_FAT | regulation of cell adhesion                               | 11 | 2.3 | 2.50E-03 |
| GOTERM_BP_FAT | regulation of cell migration                              | 11 | 2.3 | 1.10E-02 |
| GOTERM_BP_FAT | positive regulation of protein kinase activity            | 11 | 2.3 | 5.70E-02 |
| GOTERM_BP_FAT | positive regulation of cell differentiation               | 11 | 2.3 | 6.60E-02 |
| GOTERM_BP_FAT | positive regulation of kinase activity                    | 11 | 2.3 | 6.90E-02 |
| GOTERM_BP_FAT | positive regulation of transferase activity               | 11 | 2.3 | 8.40E-02 |
| GOTERM_BP_FAT | chromosome segregation                                    | 10 | 2.1 | 2.00E-04 |
| GOTERM_BP_FAT | cell projection assembly                                  | 10 | 2.1 | 2.40E-04 |
| GOTERM_BP_FAT | positive regulation of cellular component organization    | 10 | 2.1 | 4.10E-02 |
| GOTERM_BP_FAT | posttranscriptional regulation of gene expression         | 10 | 2.1 | 8.70E-02 |
| GOTERM_BP_FAT | negative regulation of cell differentiation               | 10 | 2.1 | 9.80E-02 |
| GOTERM_BP_FAT | regulation of organelle organization                      | 10 | 2.1 | 1.00E-01 |
| GOTERM_BP_FAT | regulation of cell morphogenesis                          | 9  | 1.9 | 1.80E-02 |
| GOTERM_BP_FAT | negative regulation of cellular protein metabolic process | 9  | 1.9 | 8.70E-02 |
| GOTERM_BP_FAT | cell cycle checkpoint                                     | 8  | 1.7 | 8.20E-03 |
| GOTERM_BP_FAT | regulation of cellular component biogenesis               | 8  | 1.7 | 6.90E-02 |
| GOTERM_BP_FAT | dephosphorylation                                         | 8  | 1.7 | 9.60E-02 |
| GOTERM_BP_FAT | negative regulation of locomotion                         | 7  | 1.5 | 4.30E-03 |
| GOTERM_BP_FAT | integrin-mediated signaling pathway                       | 7  | 1.5 | 8.40E-03 |
| GOTERM_BP_FAT | regulation of ossification                                | 7  | 1.5 | 1.40E-02 |
| GOTERM_BP_FAT | DNA damage response, signal transduction                  | 7  | 1.5 | 1.60E-02 |
| GOTERM_BP_FAT | positive regulation of cell migration                     | 7  | 1.5 | 2.50E-02 |
| GOTERM_BP_FAT | positive regulation of cell motion                        | 7  | 1.5 | 3.80E-02 |
| GOTERM_BP_FAT | positive regulation of locomotion                         | 7  | 1.5 | 3.80E-02 |
| GOTERM_BP_FAT | cell cycle arrest                                         | 7  | 1.5 | 4.60E-02 |
| GOTERM_BP_FAT | one-carbon metabolic process                              | 7  | 1.5 | 6.50E-02 |
| GOTERM_BP_FAT | regulation of DNA metabolic process                       | 7  | 1.5 | 6.90E-02 |

|               |                                                        |   |     |          |
|---------------|--------------------------------------------------------|---|-----|----------|
| GOTERM_BP_FAT | ossification                                           | 7 | 1.5 | 7.10E-02 |
| GOTERM_BP_FAT | protein ubiquitination                                 | 7 | 1.5 | 8.10E-02 |
| GOTERM_BP_FAT | bone development                                       | 7 | 1.5 | 9.20E-02 |
| GOTERM_BP_FAT | DNA integrity checkpoint                               | 6 | 1.3 | 9.90E-03 |
| GOTERM_BP_FAT | negative regulation of cell migration                  | 6 | 1.3 | 1.40E-02 |
| GOTERM_BP_FAT | negative regulation of cell motion                     | 6 | 1.3 | 2.10E-02 |
| GOTERM_BP_FAT | regulation of action potential                         | 6 | 1.3 | 2.90E-02 |
| GOTERM_BP_FAT | regulation of gene expression, epigenetic              | 6 | 1.3 | 4.50E-02 |
| GOTERM_BP_FAT | regulation of cell-matrix adhesion                     | 5 | 1.1 | 4.40E-03 |
| GOTERM_BP_FAT | mitotic sister chromatid segregation                   | 5 | 1.1 | 1.20E-02 |
| GOTERM_BP_FAT | sister chromatid segregation                           | 5 | 1.1 | 1.40E-02 |
| GOTERM_BP_FAT | determination of left/right symmetry                   | 5 | 1.1 | 2.10E-02 |
| GOTERM_BP_FAT | osteoblast differentiation                             | 5 | 1.1 | 2.10E-02 |
| GOTERM_BP_FAT | determination of symmetry                              | 5 | 1.1 | 2.30E-02 |
| GOTERM_BP_FAT | determination of bilateral symmetry                    | 5 | 1.1 | 2.30E-02 |
| GOTERM_BP_FAT | regulation of cell-substrate adhesion                  | 5 | 1.1 | 2.80E-02 |
| GOTERM_BP_FAT | phagocytosis                                           | 5 | 1.1 | 3.30E-02 |
| GOTERM_BP_FAT | DNA damage checkpoint                                  | 5 | 1.1 | 3.30E-02 |
| GOTERM_BP_FAT | sulfur compound biosynthetic process                   | 5 | 1.1 | 3.70E-02 |
| GOTERM_BP_FAT | regulation of action potential in neuron               | 5 | 1.1 | 4.70E-02 |
| GOTERM_BP_FAT | regulation of cyclin-dependent protein kinase activity | 5 | 1.1 | 4.70E-02 |
| GOTERM_BP_FAT | nucleotide-excision repair                             | 5 | 1.1 | 5.00E-02 |
| GOTERM_BP_FAT | gene silencing                                         | 5 | 1.1 | 5.30E-02 |
| GOTERM_BP_FAT | DNA-dependent DNA replication                          | 5 | 1.1 | 5.90E-02 |
| GOTERM_BP_FAT | response to UV                                         | 5 | 1.1 | 6.20E-02 |
| GOTERM_BP_FAT | JNK cascade                                            | 5 | 1.1 | 6.20E-02 |
| GOTERM_BP_FAT | positive regulation of cell adhesion                   | 5 | 1.1 | 6.50E-02 |
| GOTERM_BP_FAT | double-strand break repair                             | 5 | 1.1 | 7.10E-02 |
| GOTERM_BP_FAT | regulation of DNA replication                          | 5 | 1.1 | 7.10E-02 |
| GOTERM_BP_FAT | stress-activated protein kinase signaling pathway      | 5 | 1.1 | 7.50E-02 |
| GOTERM_BP_FAT | cellular response to extracellular stimulus            | 5 | 1.1 | 7.80E-02 |
| GOTERM_BP_FAT | lipid modification                                     | 5 | 1.1 | 9.70E-02 |

|               |                                                        |   |     |          |
|---------------|--------------------------------------------------------|---|-----|----------|
| GOTERM_BP_FAT | sister chromatid cohesion                              | 4 | 0.9 | 2.30E-03 |
| GOTERM_BP_FAT | gene silencing by miRNA                                | 4 | 0.9 | 8.40E-03 |
| GOTERM_BP_FAT | posttranscriptional gene silencing                     | 4 | 0.9 | 1.50E-02 |
| GOTERM_BP_FAT | posttranscriptional gene silencing by RNA              | 4 | 0.9 | 1.50E-02 |
| GOTERM_BP_FAT | protein polyubiquitination                             | 4 | 0.9 | 2.70E-02 |
| GOTERM_BP_FAT | cilium assembly                                        | 4 | 0.9 | 3.30E-02 |
| GOTERM_BP_FAT | regulation of bone mineralization                      | 4 | 0.9 | 3.90E-02 |
| GOTERM_BP_FAT | regulation of biomineral formation                     | 4 | 0.9 | 4.60E-02 |
| GOTERM_BP_FAT | cilium morphogenesis                                   | 4 | 0.9 | 5.00E-02 |
| GOTERM_BP_FAT | gene silencing by RNA                                  | 4 | 0.9 | 5.00E-02 |
| GOTERM_BP_FAT | insulin receptor signaling pathway                     | 4 | 0.9 | 6.60E-02 |
| GOTERM_BP_FAT | regulation of anti-apoptosis                           | 4 | 0.9 | 7.10E-02 |
| GOTERM_BP_FAT | axon ensheathment                                      | 4 | 0.9 | 8.90E-02 |
| GOTERM_BP_FAT | ensheathment of neurons                                | 4 | 0.9 | 8.90E-02 |
| GOTERM_BP_FAT | regulation of osteoblast differentiation               | 4 | 0.9 | 9.40E-02 |
| GOTERM_BP_FAT | mitotic cell cycle checkpoint                          | 4 | 0.9 | 9.40E-02 |
| GOTERM_BP_FAT | negative regulation of cell adhesion                   | 4 | 0.9 | 9.40E-02 |
| GOTERM_BP_FAT | apoptotic cell clearance                               | 3 | 0.6 | 8.90E-03 |
| GOTERM_BP_FAT | substrate adhesion-dependent cell spreading            | 3 | 0.6 | 1.20E-02 |
| GOTERM_BP_FAT | regulation of DNA replication initiation               | 3 | 0.6 | 2.00E-02 |
| GOTERM_BP_FAT | gene silencing by miRNA, production of miRNAs          | 3 | 0.6 | 3.60E-02 |
| GOTERM_BP_FAT | dsRNA fragmentation                                    | 3 | 0.6 | 4.10E-02 |
| GOTERM_BP_FAT | DNA unwinding during replication                       | 3 | 0.6 | 4.70E-02 |
| GOTERM_BP_FAT | positive regulation of actin filament bundle formation | 3 | 0.6 | 4.70E-02 |
| GOTERM_BP_FAT | DNA replication initiation                             | 3 | 0.6 | 6.10E-02 |
| GOTERM_BP_FAT | peptide biosynthetic process                           | 3 | 0.6 | 6.80E-02 |
| GOTERM_BP_FAT | DNA geometric change                                   | 3 | 0.6 | 7.50E-02 |
| GOTERM_BP_FAT | negative regulation of endothelial cell proliferation  | 3 | 0.6 | 7.50E-02 |
| GOTERM_BP_FAT | DNA duplex unwinding                                   | 3 | 0.6 | 7.50E-02 |
| GOTERM_BP_FAT | regulation of stress fiber formation                   | 3 | 0.6 | 8.20E-02 |
| GOTERM_BP_FAT | virus-host interaction                                 | 3 | 0.6 | 9.00E-02 |
| GOTERM_BP_FAT | regulation of interleukin-1 beta production            | 3 | 0.6 | 9.00E-02 |
| GOTERM_BP_FAT | regulation of actin filament bundle formation          | 3 | 0.6 | 9.80E-02 |

|               |                                                              |   |     |          |
|---------------|--------------------------------------------------------------|---|-----|----------|
| GOTERM_BP_FAT | photoreceptor cell maintenance                               | 3 | 0.6 | 9.80E-02 |
| GOTERM_BP_FAT | maintenance of sister chromatid cohesion                     | 2 | 0.4 | 7.40E-02 |
| GOTERM_BP_FAT | maintenance of mitotic sister chromatid cohesion             | 2 | 0.4 | 7.40E-02 |
| GOTERM_BP_FAT | regulation of transcriptional preinitiation complex assembly | 2 | 0.4 | 9.70E-02 |
| GOTERM_BP_FAT | negative regulation of smooth muscle cell migration          | 2 | 0.4 | 9.70E-02 |
| GOTERM_BP_FAT | osteoblast fate commitment                                   | 2 | 0.4 | 9.70E-02 |

**Dataset S1: List of alternatively spliced events upon BORIS knockdown in MCF7 cells**

The excel file includes alternative splicing events and differentially expressed genes in shControl vs. shBORIS transfected MCF7 cells identified from Affymetrix HTA 2.0 array data using Transcriptome analysis console (Affymetrix). Algorithm options and default filtering criteria used for the identification of events are included in the file.
